# Supplementary material
Source: publisher figshare collection journal article supplement (https://acs.figshare.com/ndownloader/files/4156267)
Supplement: Supplementary file 1 [file 4156267]

# **Supporting Information for:**

## **Stereoselective synthesis of Norephedrine and Norpseudoephedrine by Using Asymmetric Transfer Hydrogenation Accompanied by Dynamic Kinetic Resolution**

**Hyeon-Kyu Lee,\* Soyeong Kang, and Eun Bok Choi**

*Bio-Organic Science Division, Korea Research Institute of Chemical Technology, PO Box 107, Yuseong, Daejeon 305-600, Korea; Medicinal and Pharmaceutical Chemistry Major, University of Science and Technology, 113 Gwahango, Yuseong, Daejeon 305-333, Korea*

# Table of Contents

|                                                                                                                                                        |       |
|--------------------------------------------------------------------------------------------------------------------------------------------------------|-------|
| <b>1. Chiral HPLC Chromatogram</b>                                                                                                                     | 3     |
| 1-1. (4 <i>S</i> ,5 <i>R</i> )-4-Methyl-5-phenyl-[1,2,3]oxathiazolidine 2,2-dioxide, (4 <i>S</i> ,5 <i>R</i> )- <b>7</b>                               | 3     |
| 1-2. (4 <i>R</i> ,5 <i>S</i> )-4-Methyl-5-phenyl-[1,2,3]oxathiazolidine 2,2-dioxide, (4 <i>R</i> ,5 <i>S</i> )- <b>7</b>                               | 4     |
| 1-3. (4 <i>S</i> ,5 <i>R</i> )-5-(4-Fluoro-phenyl)-4-methyl-[1,2,3]oxathiazolidine 2,2-dioxide, (4 <i>S</i> ,5 <i>R</i> )- <b>12</b>                   | 5     |
| 1-4. (4 <i>S</i> ,5 <i>R</i> )-4-Ethyl-5-phenyl-[1,2,3]oxathiazolidine 2,2-dioxide, (4 <i>S</i> ,5 <i>R</i> )- <b>15</b>                               | 6     |
| 2-1. (1 <i>R</i> ,2 <i>S</i> )-2-Amino-1-phenyl-propan-1-ol, (1 <i>R</i> ,2 <i>S</i> )- <b>1a</b> , [(1 <i>R</i> ,2 <i>S</i> )-(-)-Norephedrine]       | 7     |
| 2-2. (1 <i>S</i> ,2 <i>R</i> )-2-Amino-1-phenyl-propan-1-ol, (1 <i>S</i> ,2 <i>R</i> )- <b>1b</b> , [(1 <i>S</i> ,2 <i>R</i> )-(+)-Norephedrine]       | 8     |
| 3-1. <i>N</i> -Boc-(4 <i>S</i> ,5 <i>R</i> )- <b>7</b>                                                                                                 | 9     |
| 3-2. <i>N</i> -Boc-(4 <i>R</i> ,5 <i>S</i> )- <b>7</b>                                                                                                 | 10    |
| 3-3. (4 <i>S</i> ,5 <i>S</i> )-2-( <i>tert</i> -Butoxycarbonyl-amino)-1-(benzoyl-oxy)-1-phenyl-propane, (4 <i>S</i> ,5 <i>S</i> )- <b>9</b>            | 11    |
| 3-4. (4 <i>R</i> ,5 <i>R</i> )-2-( <i>tert</i> -Butoxycarbonyl-amino)-1-(benzoyl-oxy)-1-phenyl-propane, (4 <i>R</i> ,5 <i>R</i> )- <b>9</b>            | 12    |
| 3-5. (1 <i>S</i> ,2 <i>S</i> )-2-( <i>tert</i> -Butoxycarbonyl-amino)-1-phenyl-propan-1-ol, <i>N</i> -Boc-(1 <i>S</i> ,2 <i>S</i> )- <b>2a</b>         | 13    |
| 3-6. (1 <i>R</i> ,2 <i>R</i> )-2-( <i>tert</i> -Butoxycarbonyl-amino)-1-phenyl-propan-1-ol, <i>N</i> -Boc-(1 <i>R</i> ,2 <i>R</i> )- <b>2b</b>         | 14    |
| 3-7. (1 <i>S</i> ,2 <i>S</i> )-2-Amino-1-phenyl-propan-1-ol, (1 <i>S</i> ,2 <i>S</i> )- <b>2a</b> , [(1 <i>S</i> ,2 <i>S</i> )-(+)-norpseudoephedrine] | 15    |
| 3-8. (1 <i>R</i> ,2 <i>R</i> )-2-Amino-1-phenyl-propan-1-ol, (1 <i>R</i> ,2 <i>R</i> )- <b>2b</b> , [(1 <i>R</i> ,2 <i>R</i> )-(-)-norpseudoephedrine] | 16    |
| <b>2. X-ray crystallography analysis data of (4<i>S</i>,5<i>R</i>)-<b>7</b></b>                                                                        | 17    |
| <b>3. <sup>1</sup>H- &amp; <sup>13</sup>C-NMR Spectra</b>                                                                                              | 19~52 |

## 1. Chiral HPLC Chromatogram

### 1-1. (4*S*,5*R*)-4-Methyl-5-phenyl-[1,2,3]oxathiazolidine 2,2-dioxide, (4*S*,5*R*)-7

Chiralcel AD-H, 10% isopropanol/hexanes, 1.5 mL/min, 254 nm, tr(minor) = 9.1 min, tr(major) = 10.6 min.

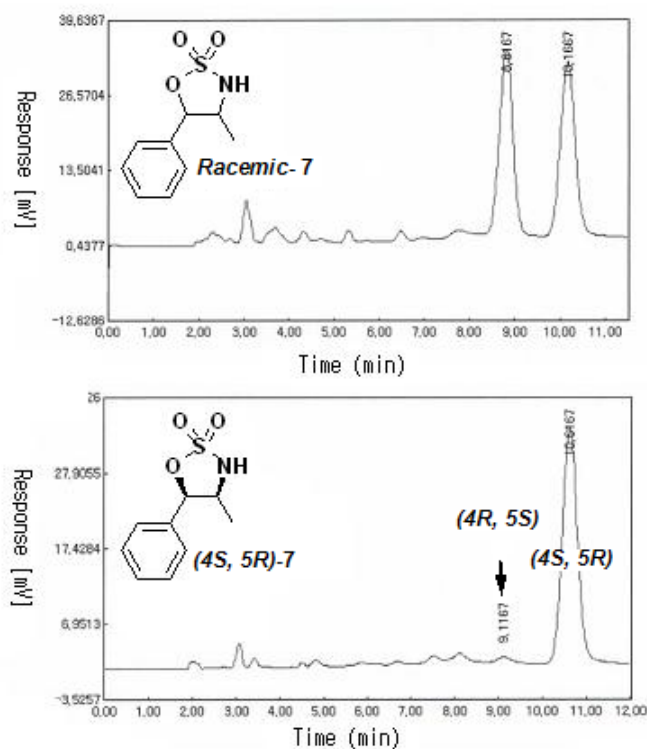

Result Report

| Peak # | Time (min) | Area [mV*s] | BL | wide(sec) | Area (%) |
|--------|------------|-------------|----|-----------|----------|
| 1      | 9.1167     | 16.3031     | FF | 50.0000   | 1.9564   |
| 2      | 10.6167    | 817.0167    | FF | 122.0000  | 98.0436  |
| Total  |            | 833.3198    |    |           |          |

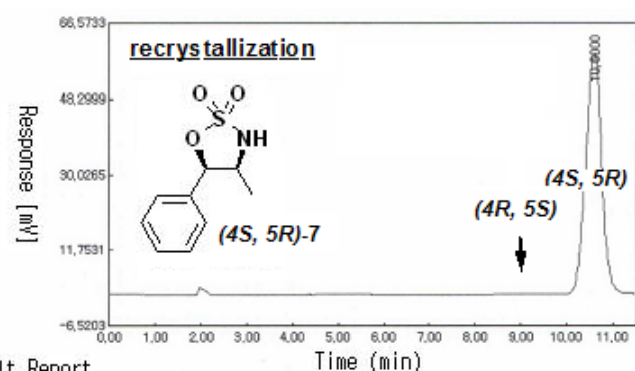

Result Report

| Peak # | Time (min) | Area[mV*s] | BL | wide(sec) | Area (%) |
|--------|------------|------------|----|-----------|----------|
| 1      | 10.6000    | 1432.5622  | BB | 68.0000   | 100.0000 |
| Total  |            | 1432.5623  |    |           |          |

## 1-2. (4*R*,5*S*)-4-Methyl-5-phenyl-[1,2,3]oxathiazolidine 2,2-dioxide, (4*R*,5*S*)-7

Chiralcel AD-H, 10% isopropanol/hexanes, 1.5 mL/min, 254 nm, tr(major) = 9.1 min, tr(minor) = 10.6 min.

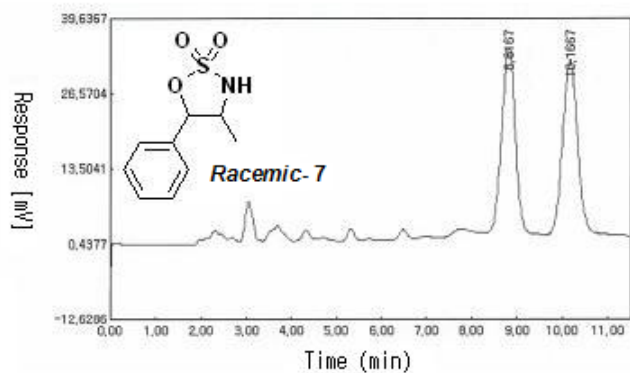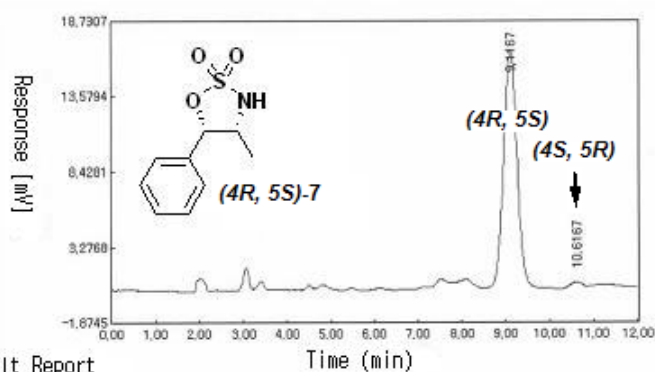

Result Report

| Peak # | Time (min) | Area [mV*s] | BL | wide(sec) | Area (%) |
|--------|------------|-------------|----|-----------|----------|
| 1      | 9.1167     | 361.7222    | FF | 85.0000   | 98.2133  |
| 2      | 10.6167    | 6.5804      | FF | 38.0000   | 1.7867   |
| Total  |            | 368.3026    |    |           |          |

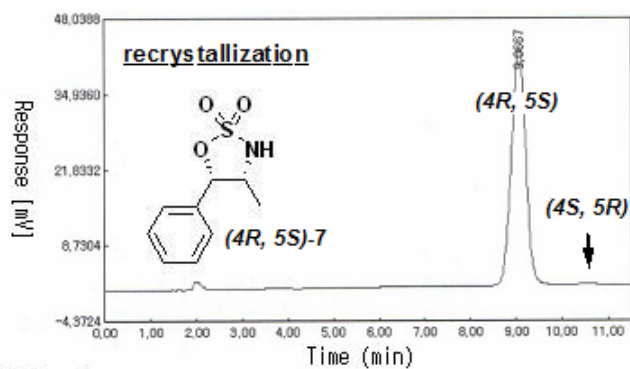

Result Report

| Peak # | Time (min) | Area [mV*s] | BL | wide(sec) | Area (%) |
|--------|------------|-------------|----|-----------|----------|
| 1      | 9.0667     | 910.1313    | BB | 59.0000   | 100.0000 |
| Total  |            | 910.1313    |    |           |          |

**1-3. (4*S*,5*R*)-5-(4-Fluoro-phenyl)-4-methyl-[1,2,3]oxathiazolidine 2,2-dioxide, (4*S*,5*R*)-12**

Chiralcel AD-H, 10% isopropanol/hexanes, 1.5 mL/min, 254 nm, tr(minor) = 9.3 min, tr(major) = 12.1 min.

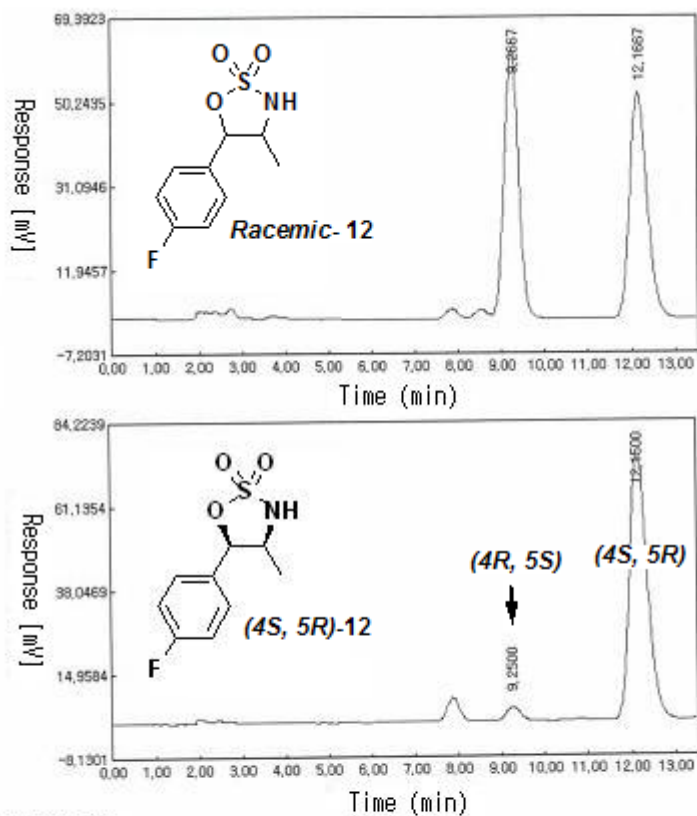

Result Report

| Peak # | Time (min) | Area [mV*s] | BL | wide(sec) | Area (%) |
|--------|------------|-------------|----|-----------|----------|
| 1      | 9.2500     | 78.7450     | BB | 42.0000   | 3.6071   |
| 2      | 12.1500    | 2104.3198   | BB | 78.0000   | 96.3929  |
| Total  |            | 2183.0647   |    |           |          |

**1-4. (4*S*,5*R*)-4-Ethyl-5-phenyl-[1,2,3]oxathiazolidine 2,2-dioxide, (4*S*,5*R*)-15**

Chiralcel AD-H, 10% isopropanol/hexanes, 1.0 mL/min, 254 nm, tr(minor) = 12.0 min, tr(major) = 13.8 min.

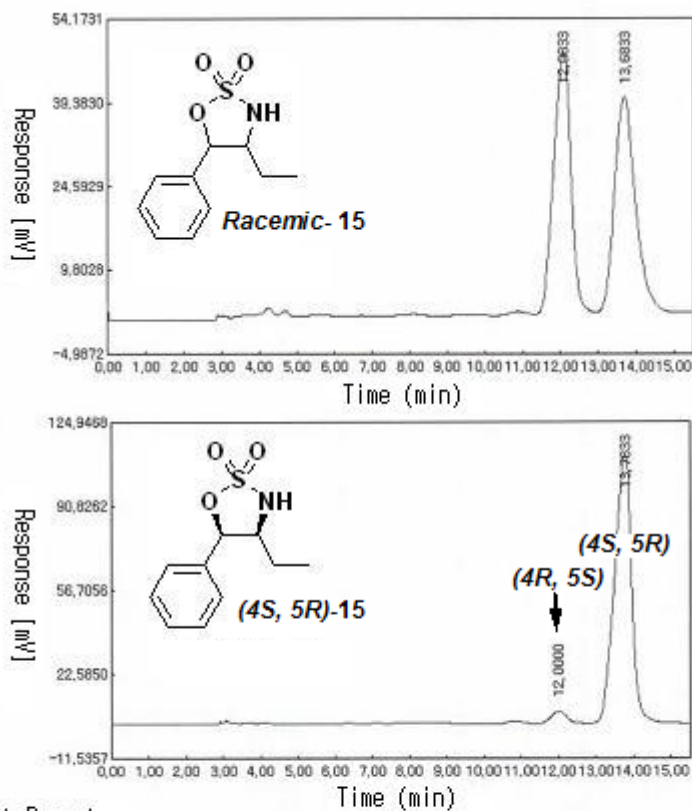

**Result Report**

| Peak # | Time (min) | Area [mV*s] | BL | wide(sec) | Area (%) |
|--------|------------|-------------|----|-----------|----------|
| 1      | 12.0000    | 119.7793    | BB | 51.0000   | 3.3040   |
| 2      | 13.7833    | 3505.4774   | BB | 94.0000   | 96.6960  |
| Total  |            | 3625.2568   |    |           |          |

## 2-1. (1*R*,2*S*)-2-Amino-1-phenyl-propan-1-ol, (1*R*,2*S*)-1a, [(1*R*,2*S*)-(-)-Norephedrine]

Chiralcel AD-H, 10% isopropanol/hexanes, 1.0 mL/min, 254 nm, tr(minor) = 8.3 min, tr(major) = 16.4 min.

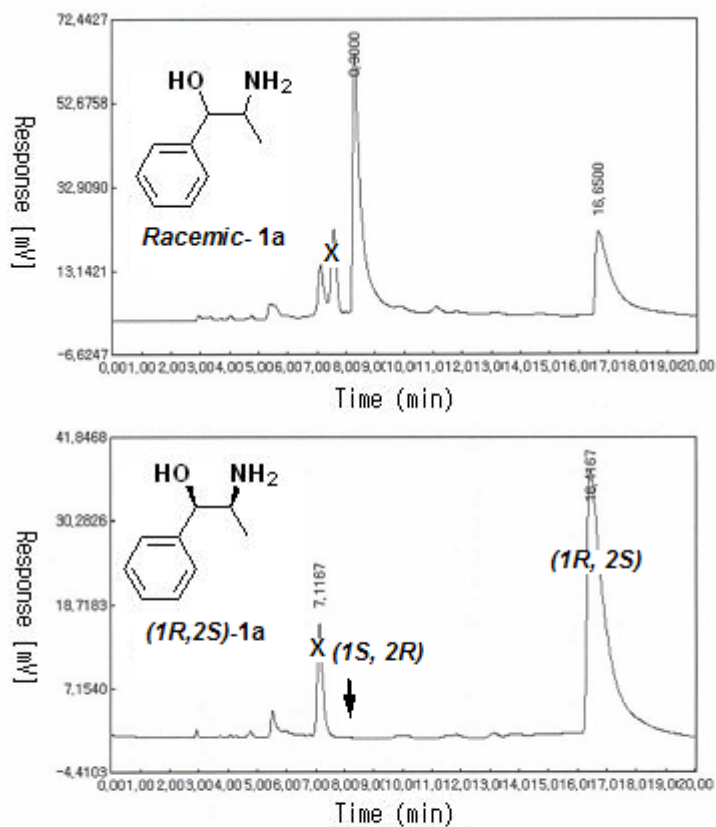

### Result Report

| Peak # | Time (min) | Area.[mV*s] | BL | wide(sec) | Area (%) |
|--------|------------|-------------|----|-----------|----------|
| 1      | 7.1167     | 208.1875    | BB | 39.0000   | 13.3438  |
| 2      | 16.4167    | 1351.9909   | BB | 96.0000   | 86.6562  |
| Total  |            | 1560.1783   |    |           |          |

## 2-2. (1*S*,2*R*)-2-Amino-1-phenyl-propan-1-ol, (1*S*,2*R*)-1b, [(1*S*,2*R*)-(+)-Norephedrine]

Chiralcel AD-H, 10% isopropanol/hexanes, 1.0 mL/min, 254 nm, tr(major) = 8.3 min, tr(minor) = 16.4 min.

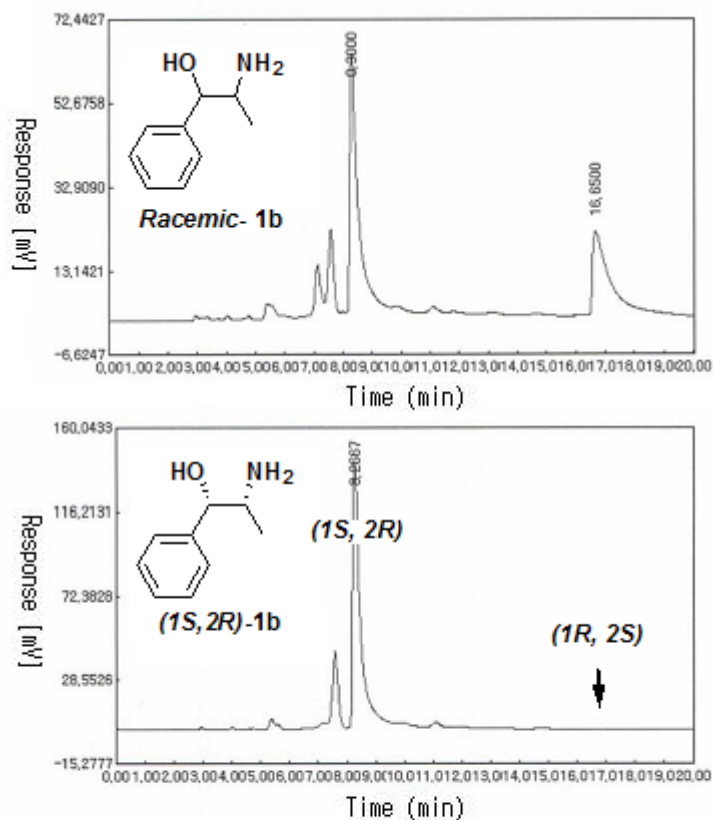

### Result Report

| Peak # | Time (min) | Area[mV*s] | BL | wide(sec) | Area (%) |
|--------|------------|------------|----|-----------|----------|
| 1      | 8.2667     | 2517.0946  | BB | 83.0000   | 100.0000 |
| Total  |            | 2517.0947  |    |           |          |



**3-1. (4*S*,5*R*)-4-Methyl-2,2-dioxo-5-phenyl-2λ<sup>6</sup>-[1,2,3]oxathiazolidine-3-carboxylic acid tert-butyl ester, *N*-Boc-(4*S*,5*R*)-7**

Chiralcel AD-H, 30% isopropanol/hexanes, 1.0 mL/min, 254 nm, tr(major) = 4.6 min, tr(minor) = 7.3 min.

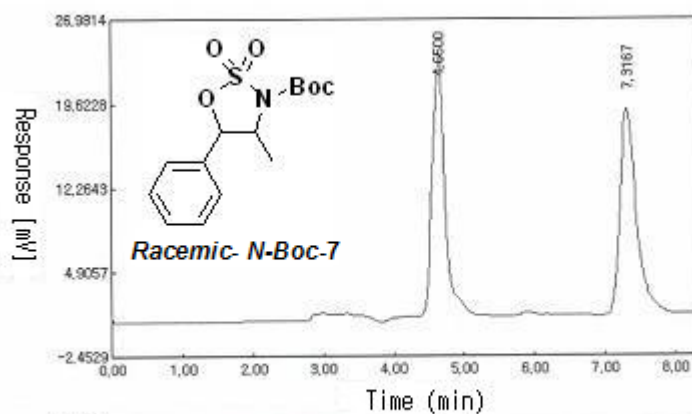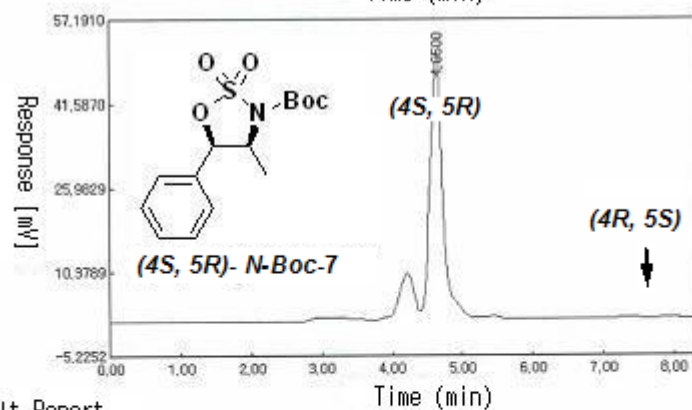

Result Report

| Peak # | Time (min) | Area [mV*s] | BL | wide(sec) | Area (%) |
|--------|------------|-------------|----|-----------|----------|
| 1      | 4.6500     | 602.9331    | BB | 45.0000   | 100.0000 |
| Total  |            | 602.9331    |    |           |          |

**3-2. (4*R*,5*S*)-4-Methyl-2,2-dioxo-5-phenyl-2λ<sup>6</sup>-[1,2,3]oxathiazolidine-3-carboxylic acid tert-butyl ester, *N*-Boc-(4*R*,5*S*)-7**

Chiralcel AD-H, 30% isopropanol/hexanes, 1.0 mL/min, 254 nm, tr(minor) = 4.6 min, tr(major) = 7.3 min.

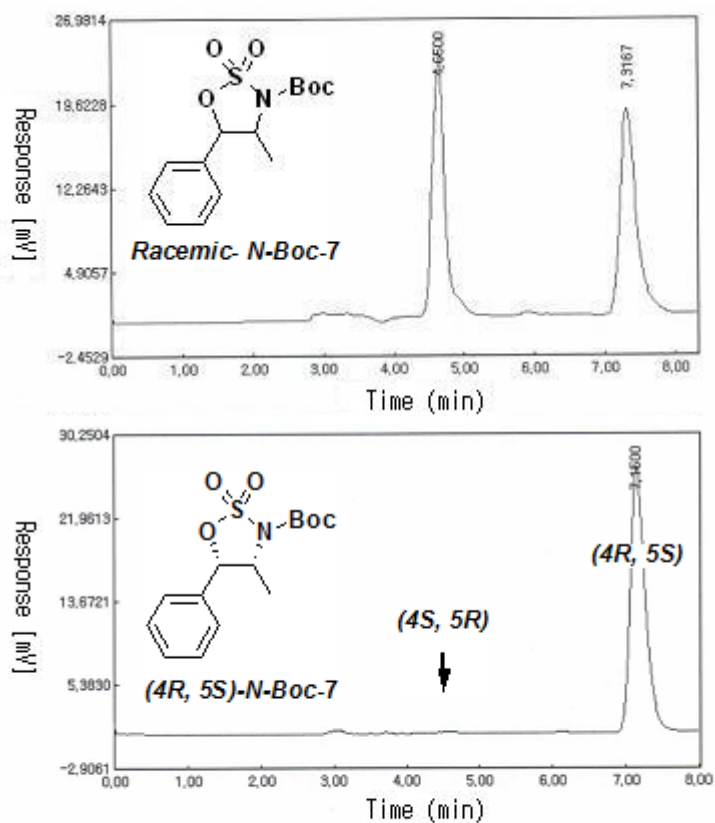

| Peak # | Time (min) | Area [mV*s] | BL | wide(sec) | Area (%) |
|--------|------------|-------------|----|-----------|----------|
| 1      | 7.1500     | 375.0975    | BB | 43.0000   | 100.0000 |
| Total  |            | 375.0975    |    |           |          |

### 3-3. (4*S*,5*S*)-2-(*tert*-Butoxycarbonyl-amino)-1-(benzoyl-oxy)-1-phenyl-propane, (4*S*,5*S*)-9

Chiralcel AD-H, 40% isopropanol/hexanes, 1.0 mL/min, 254 nm, tr(major) = 6.8 min, tr(minor) = 15.6 min.

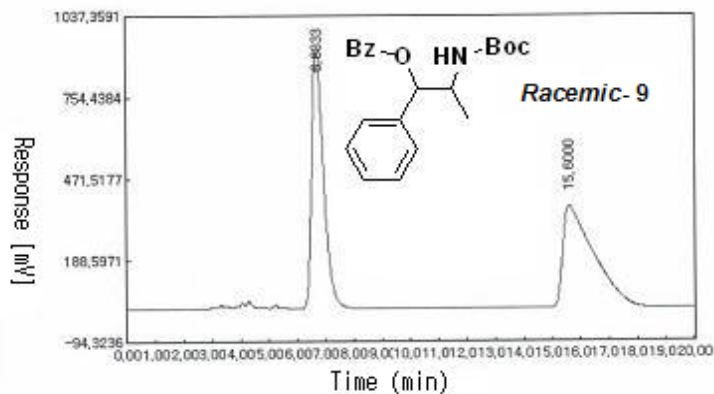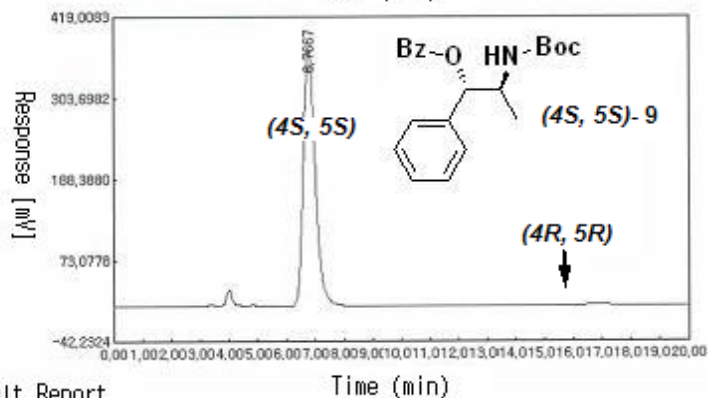

Result Report

| Peak # | Time (min) | Area [mV*s] | BL | wide(sec) | Area (%) |
|--------|------------|-------------|----|-----------|----------|
| 1      | 6.7667     | 10875.9801  | BB | 107.0000  | 100.0000 |
| Total  |            | 10875.9805  |    |           |          |

### 3-4. (4*R*,5*R*)-2-(*tert*-Butoxycarbonyl-amino)-1-(benzoyl-oxy)-1-phenyl-propane, (4*R*,5*R*)-9

Chiralcel AD-H, 40% isopropanol/hexanes, 1.0 mL/min, 254 nm, tr(minor) = 6.8 min, tr(major) = 15.6 min.

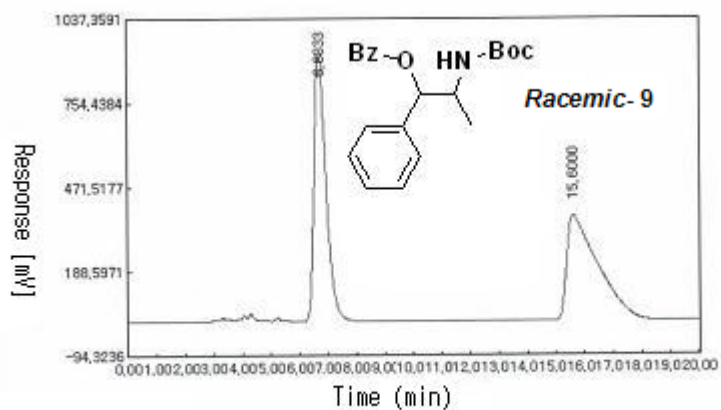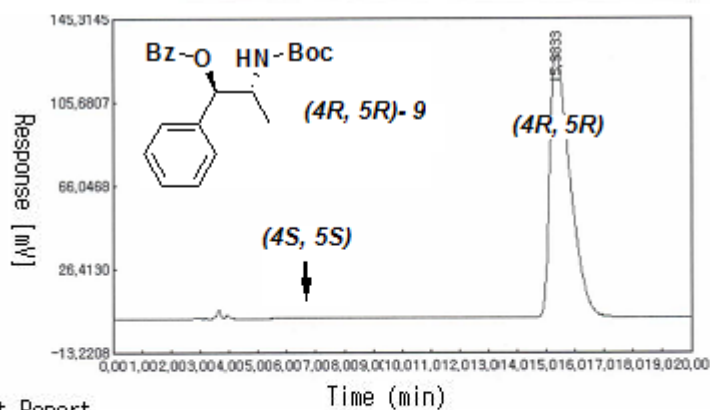

Result Report

| Peak # | Time (min) | Area [mV*s] | BL | wide(sec) | Area (%) |
|--------|------------|-------------|----|-----------|----------|
| 1      | 15.3333    | 6226.1009   | BB | 132.0000  | 100.0000 |
| Total  |            | 6226.1011   |    |           |          |

### 3-5. (1*S*,2*S*)-2-(*tert*-Butoxycarbonyl-amino)-1-phenyl-propan-1-ol, *N*-Boc-(1*S*,2*S*)-2a

Chiralcel AD-H, 30% isopropanol/hexanes, 1.0 mL/min, 254 nm, tr(major) = 4.5 min, tr(minor) = 6.2 min.

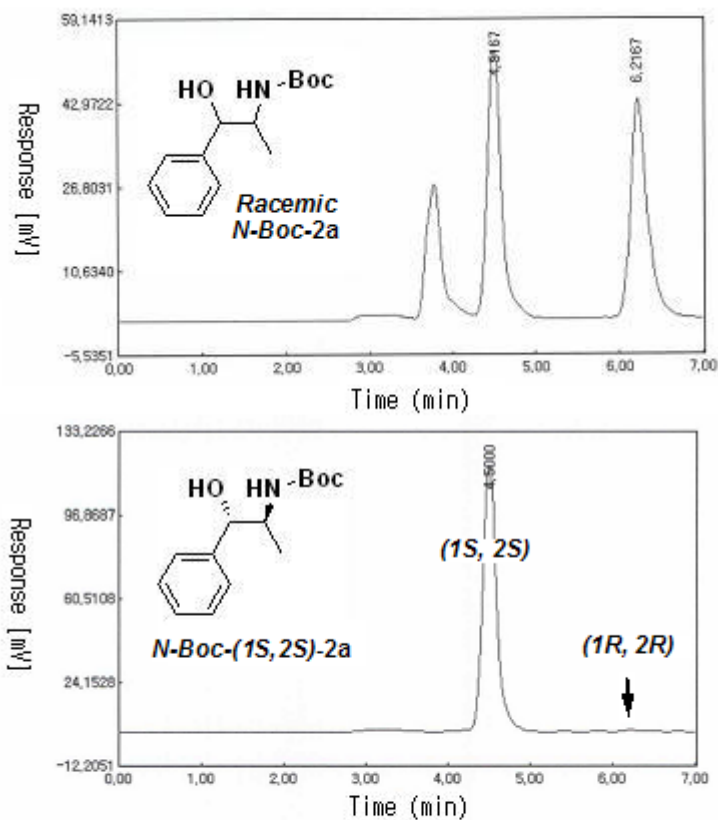

#### Result Report

| Peak # | Time (min) | Area [mV*s] | BL | wide(sec) | Area (%) |
|--------|------------|-------------|----|-----------|----------|
| 1      | 4.5000     | 1374.6741   | BB | 65.0000   | 100.0000 |
| Total  |            | 1374.6741   |    |           |          |

### 3-6. (1*R*,2*R*)-2-(*tert*-Butoxycarbonyl-amino)-1-phenyl-propan-1-ol, *N*-Boc-(1*R*,2*R*)-2b

Chiralcel AD-H, 30% isopropanol/hexanes, 1.0 mL/min, 254 nm, tr(minor) = 4.5 min, tr(major) = 6.2 min.

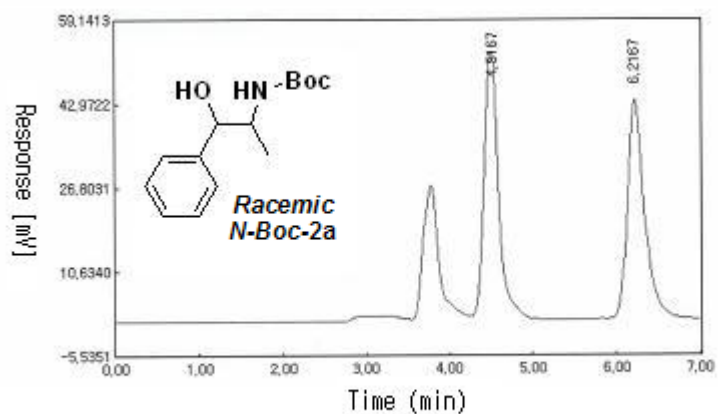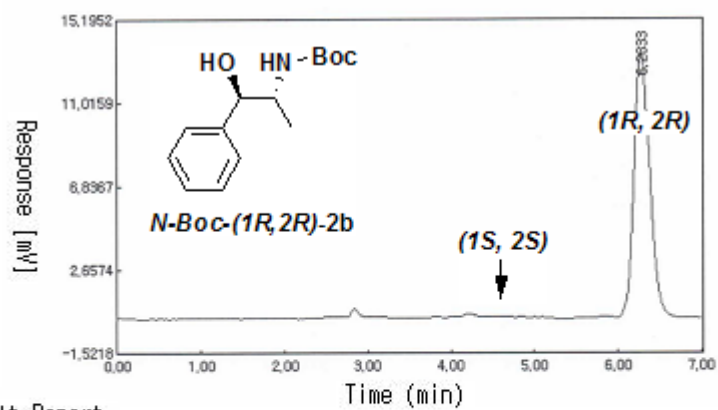

Result Report

| Peak # | Time (min) | Area [mV*s] | BL | wide(sec) | Area (%) |
|--------|------------|-------------|----|-----------|----------|
| 1      | 6.2833     | 174.7468    | BB | 34.0000   | 100.0000 |
| Total  |            | 174.7468    |    |           |          |

### 3-7. (1*S*,2*S*)-2-Amino-1-phenyl-propan-1-ol, (1*S*,2*S*)-2a, [(1*S*,2*S*)-(+)-norpseudoephedrine]

Chiralcel AD-H, 0.1/5/95 Et<sub>3</sub>N/isopropanol/hexanes (v/v/v), 1.2 mL/min, 254 nm, tr(major) = 12.5 min, tr(minor) = 13.9 min.

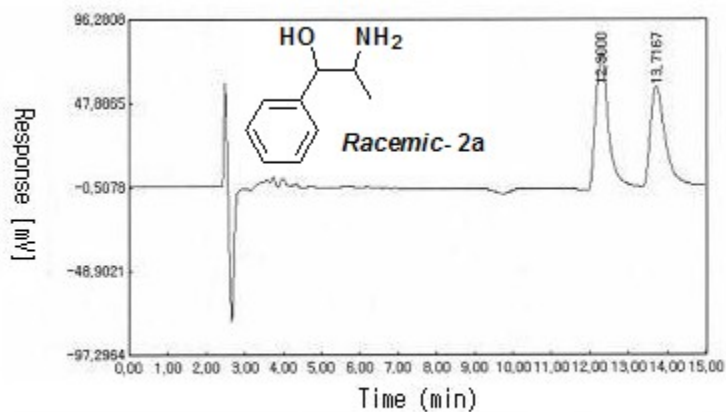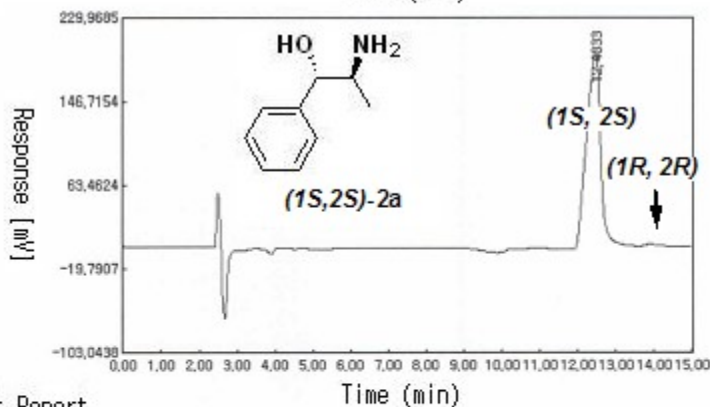

Result Report

| Peak # | Time (min) | Area [mV*s] | BL | wide(sec) | Area (%) |
|--------|------------|-------------|----|-----------|----------|
| 1      | 12.4833    | 5181.6801   | BB | 86.0000   | 100.0000 |
| Total  |            | 5181.6802   |    |           |          |

**3-8. (1*R*,2*R*)-2-Amino-1-phenyl-propan-1-ol, (1*R*,2*R*)-2b, [(1*R*,2*R*)-(-)-norpseudoephedrine]**

Chiralcel AD-H, 0.1/5/95 Et<sub>3</sub>N/isopropanol/hexanes (v/v/v), 1.2 mL/min, 254 nm, tr(minor) = 12.5 min, tr(major) = 13.9 min.

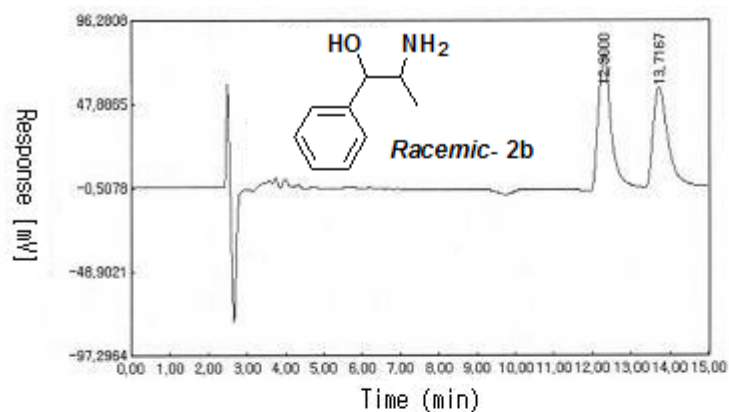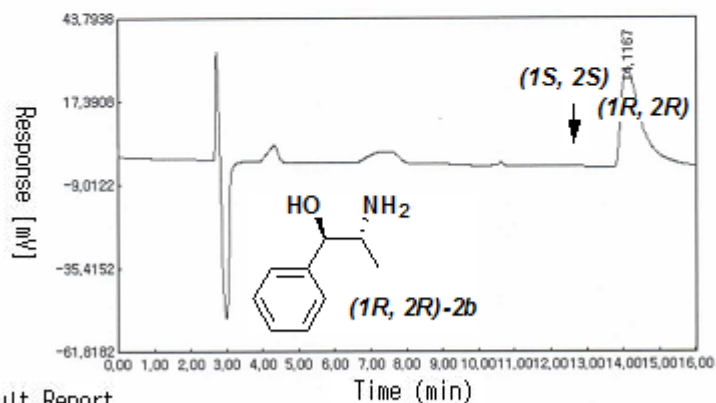

Result Report

| Peak # | Time (min) | Area [mV*s] | BL | wide(sec) | Area (%) |
|--------|------------|-------------|----|-----------|----------|
| 1      | 14.1167    | 1106.7888   | BB | 88.0000   | 100.0000 |
| Total  |            | 1106.7888   |    |           |          |



## 2. X-ray crystallography analysis data of (4*S*,5*R*)-7

CCDC 872756 contains the supplementary crystallographic data for (4*S*,5*R*)-7. These data can be obtained free of charge from The Cambridge Crystallographic Data Centre *via* [www.ccdc.cam.ac.uk/data\\_request/cif](http://www.ccdc.cam.ac.uk/data_request/cif).

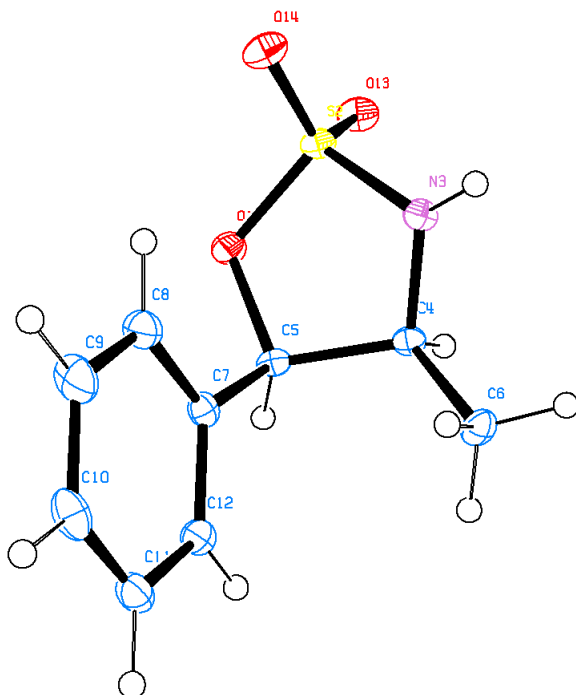

### Crystal data for (4*S*,5*R*)-7

|                      |                                                                                |
|----------------------|--------------------------------------------------------------------------------|
| Identification code  | 20120117lt2_0m                                                                 |
| Empirical formula    | C <sub>9</sub> H <sub>11</sub> N O <sub>3</sub> S                              |
| Formula weight       | 213.25                                                                         |
| Temperature          | 100(1) K                                                                       |
| Wavelength           | 0.71073 Å                                                                      |
| Crystal system       | Monoclinic                                                                     |
| Space group          | P2(1)                                                                          |
| Unit cell dimensions | a = 6.6397(1) Å = 90°<br>b = 9.9763(2) Å = 92.753(1)°<br>c = 7.5180(2) Å = 90° |
| Volume               | 497.415(18) Å <sup>3</sup>                                                     |
| Z                    | 2                                                                              |
| Density (calculated) | 1.424 Mg/m <sup>3</sup>                                                        |

|                                   |                                             |
|-----------------------------------|---------------------------------------------|
| Absorption coefficient            | 0.305 mm <sup>-1</sup>                      |
| F(000)                            | 224                                         |
| Crystal size                      | 0.22 x 0.18 x 0.08 mm <sup>3</sup>          |
| Theta range for data collection   | 2.71 to 28.57°                              |
| Index ranges                      | -8<=h<=8, -13<=k<=13, -9<=l<=10             |
| Reflections collected             | 4518                                        |
| Independent reflections           | 2000 [R(int) = 0.0172]                      |
| Completeness to theta = 28.57°    | 97.8 %                                      |
| Absorption correction             | Multi-scan                                  |
| Max. and min. transmission        | 0.9760 and 0.9359                           |
| Refinement method                 | Full-matrix least-squares on F <sup>2</sup> |
| Data / restraints / parameters    | 2000 / 1 / 127                              |
| Goodness-of-fit on F <sup>2</sup> | 1.029                                       |
| Final R indices [I>2sigma(I)]     | R1 = 0.0289, wR2 = 0.0754                   |
| R indices (all data)              | R1 = 0.0307, wR2 = 0.0770                   |
| Absolute structure parameter      | 0.07(7)                                     |
| Largest diff. peak and hole       | 0.412 and -0.451 e.Å <sup>-3</sup>          |

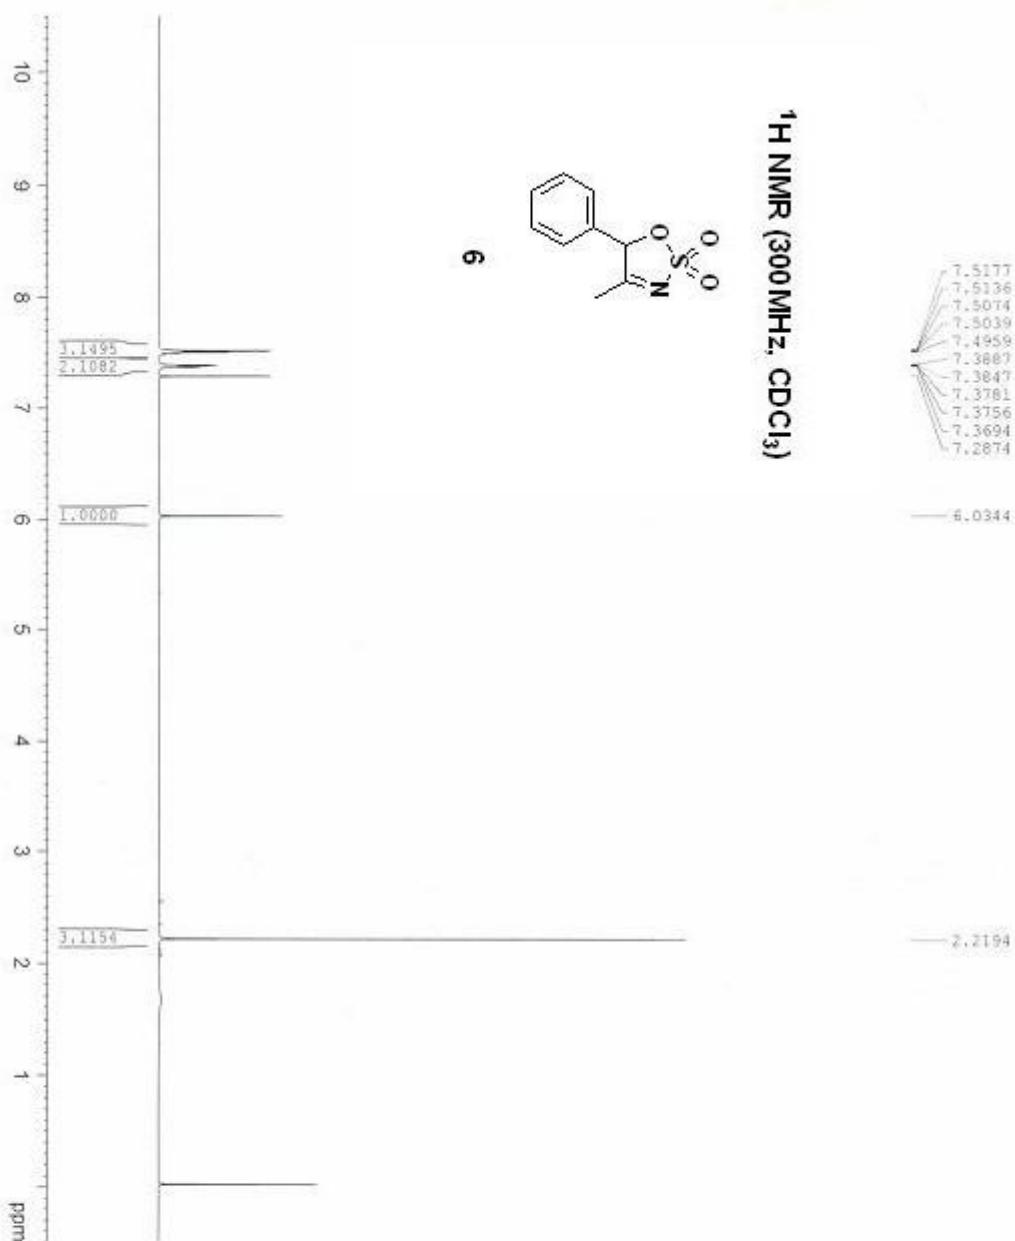

```

NAME   KSY_110906_sm
EXPNO   1
PROCNO   1
Date_    20110906
Time     18.49
INSTRUM   spect
PROBHD   5 mm DUL 13C-1
PULPROG   zg30
TD       65536
SOLVENT   CDCl3
NS       4
DS       2
SWH      7507.507 Hz
FIDRES   0.114555 Hz
AQ       4.3048143 sec
RG       256
DWT      65.600 usec
DE       6.00 usec
TE       296.9 K
D1       1.00000000 sec
TD0      1
===== CHANNEL f1 =====
NUC1     1H
P1       9.80 usec
PL1      -1.90 dB
PL1W     27.23316002 W
SFO1     500.1332508 MHz
SI       32768
SF       500.1300000 MHz
WDW      EM
SSB      0
LB       0.30 Hz
GB       0
PC       1.00

```

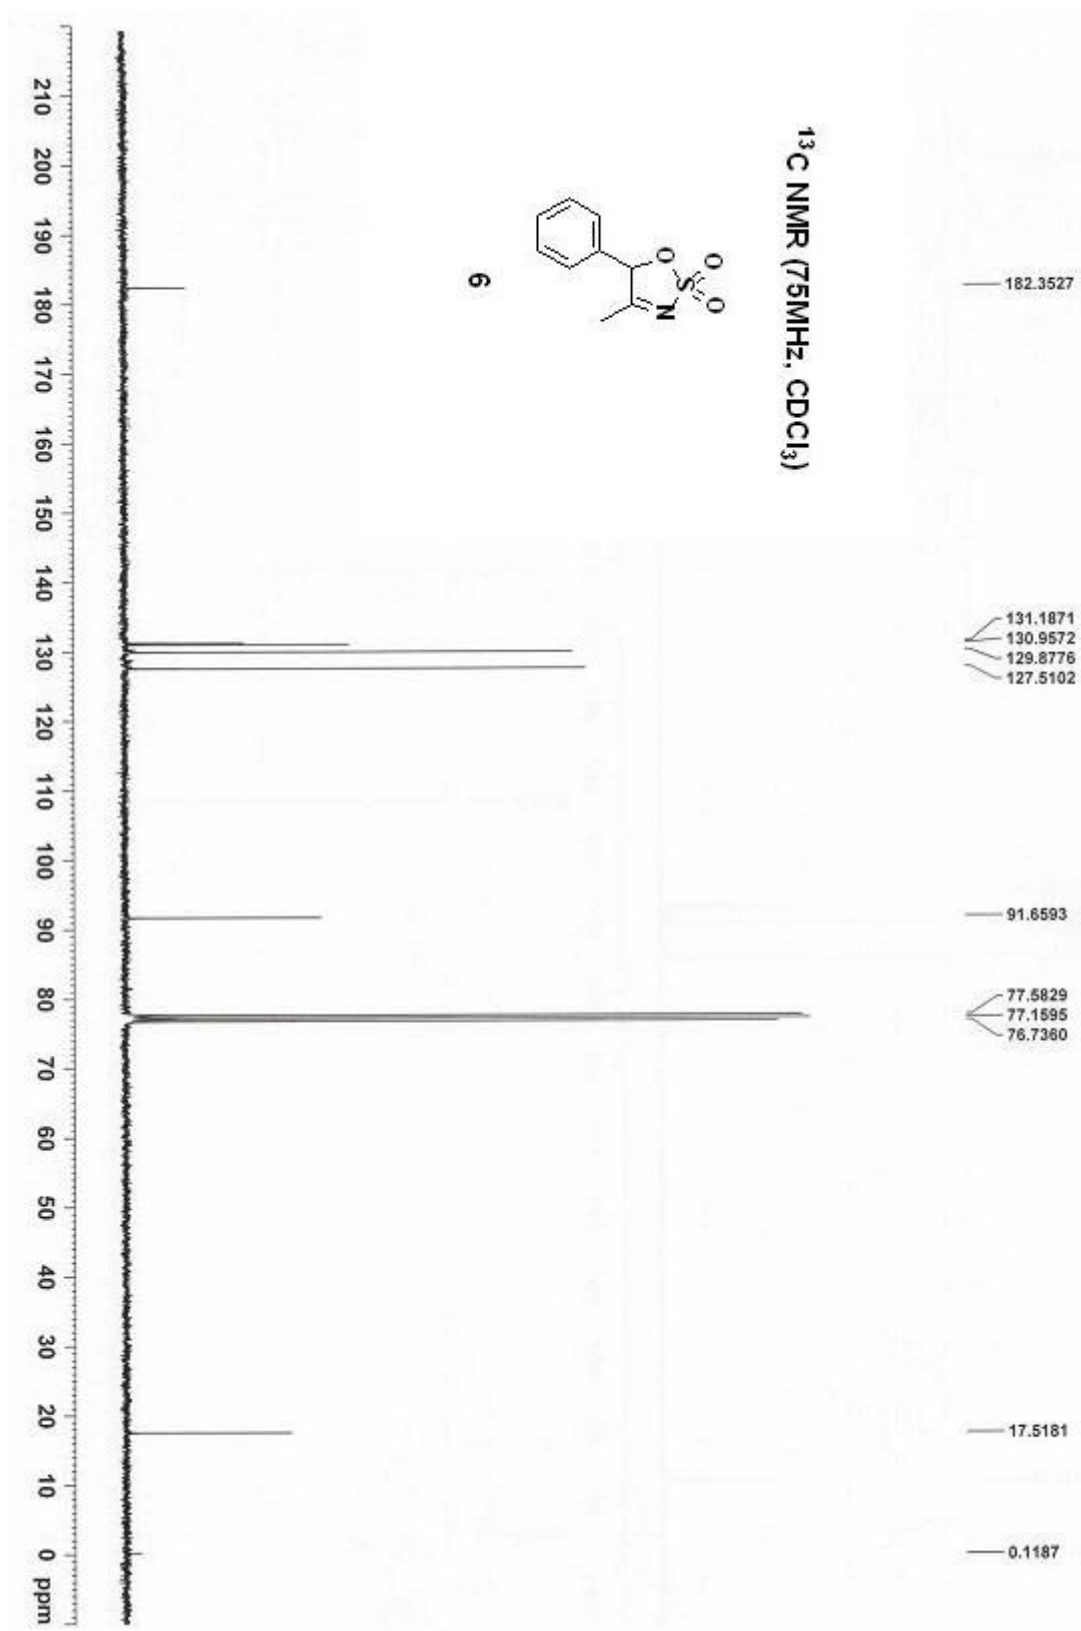

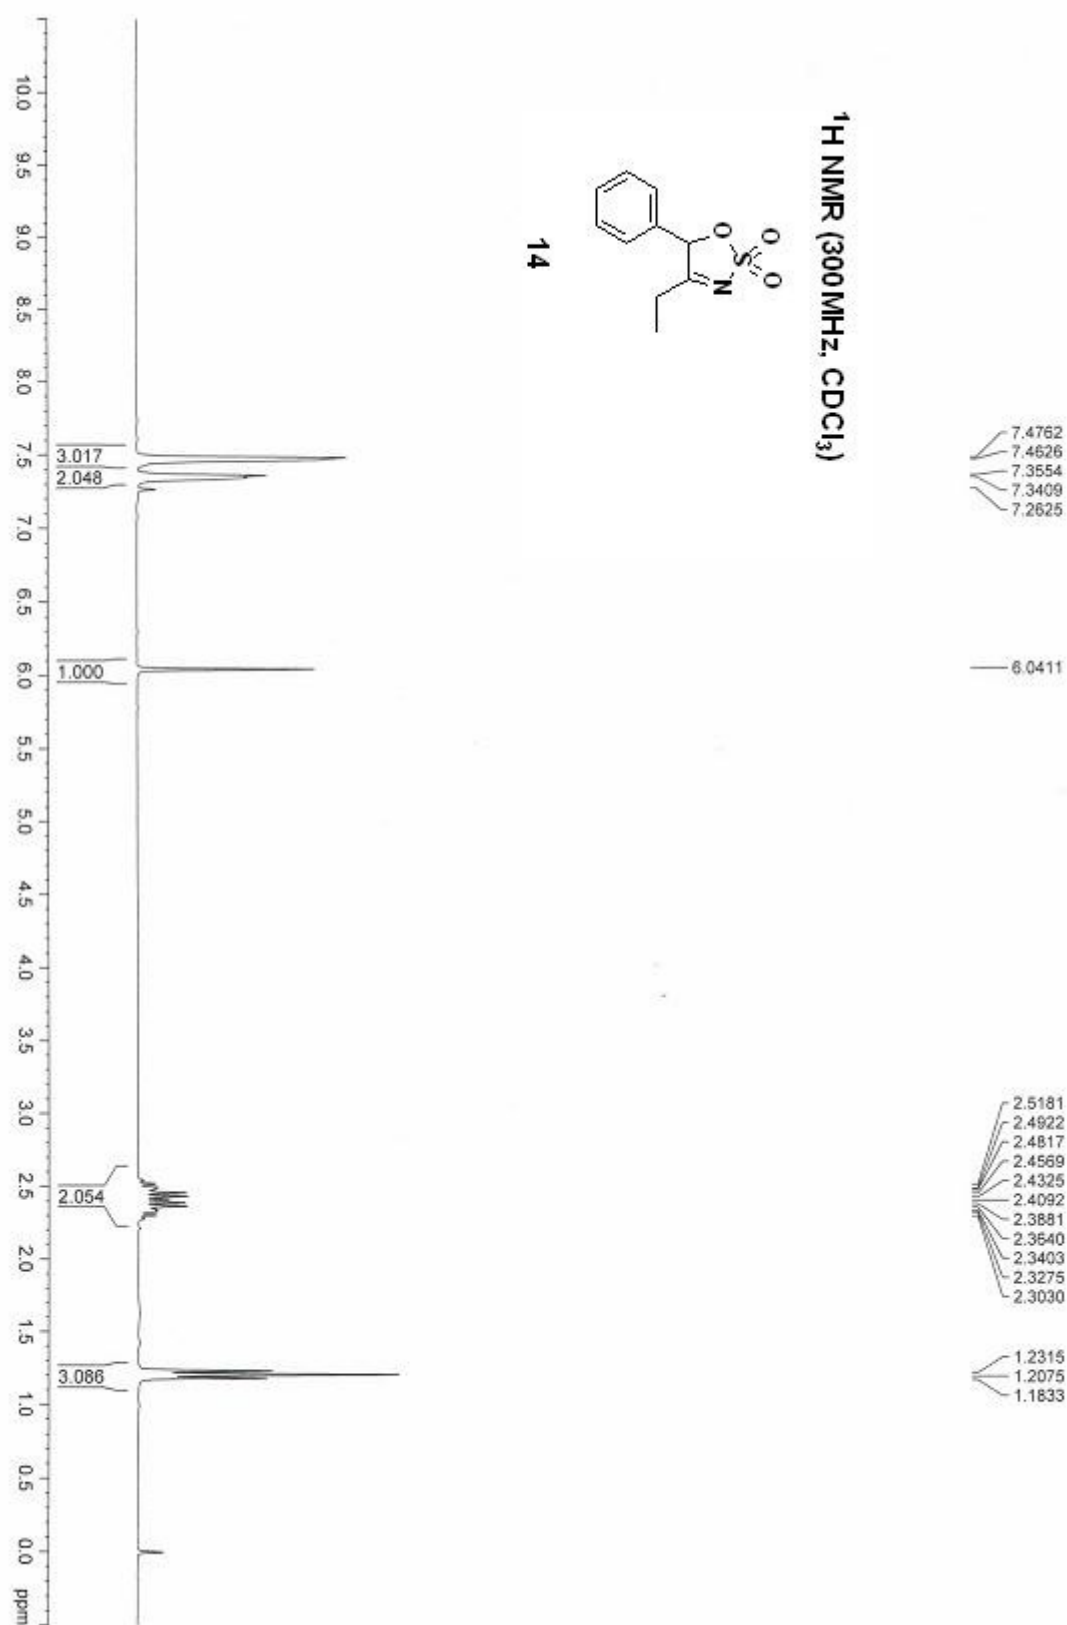

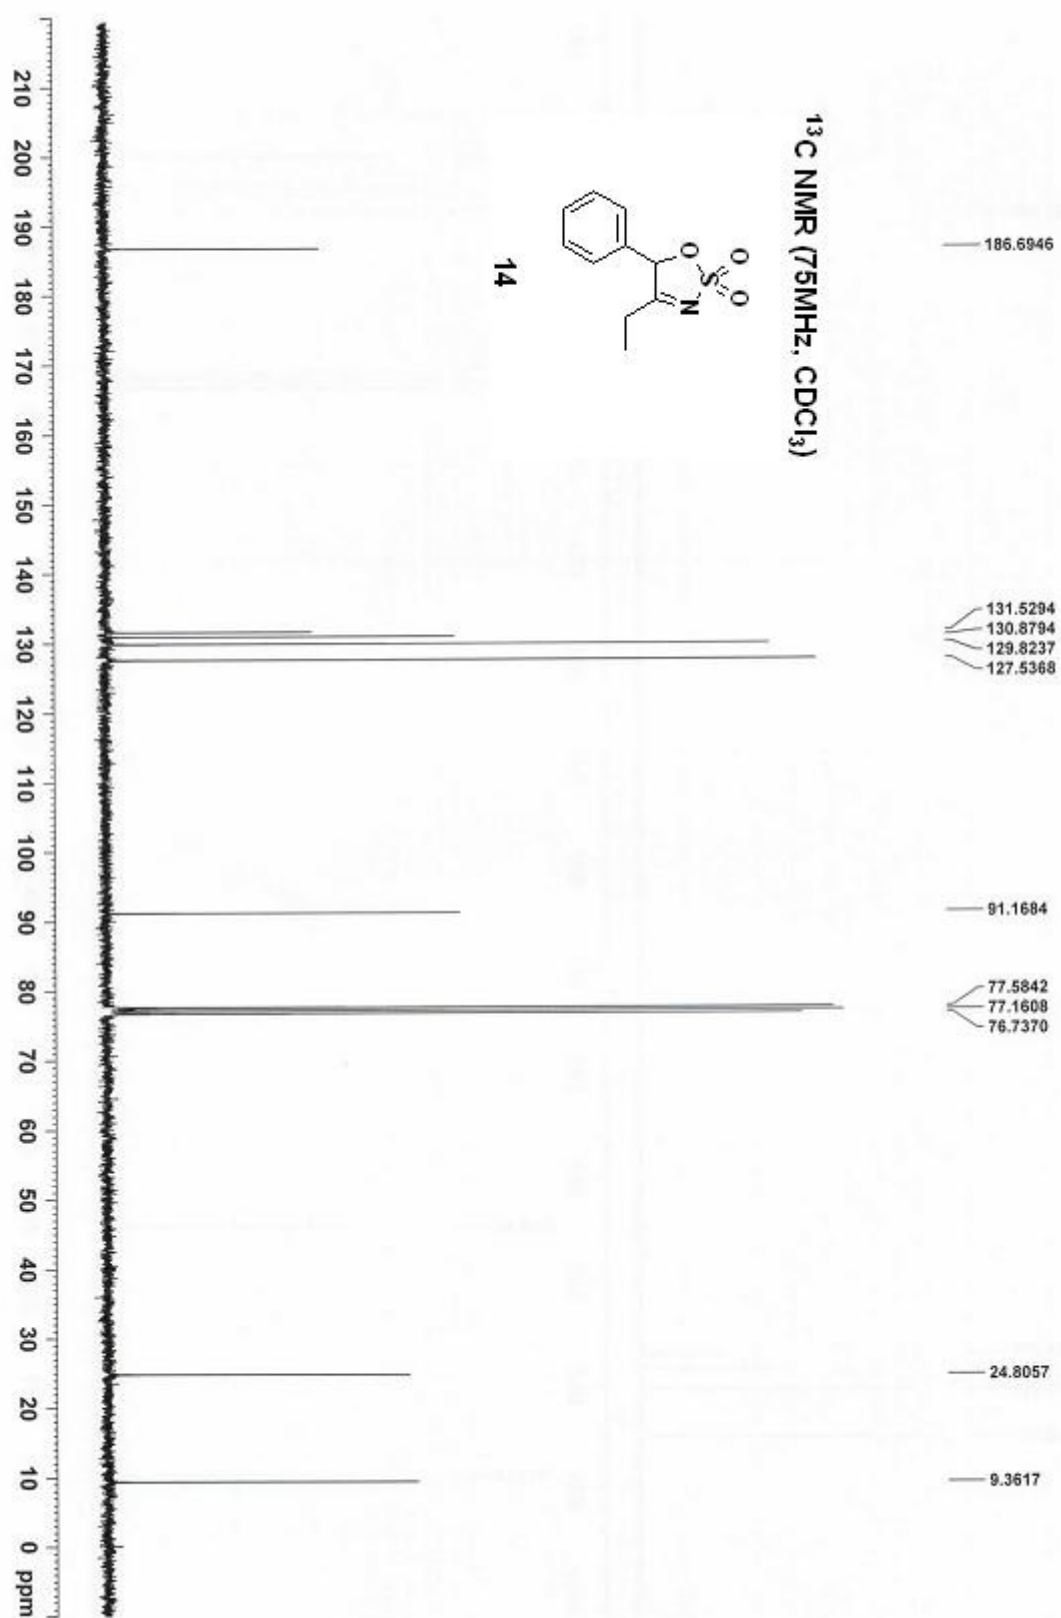

**<sup>1</sup>H NMR (500 MHz, CDCl<sub>3</sub>)**

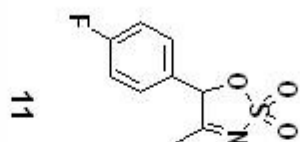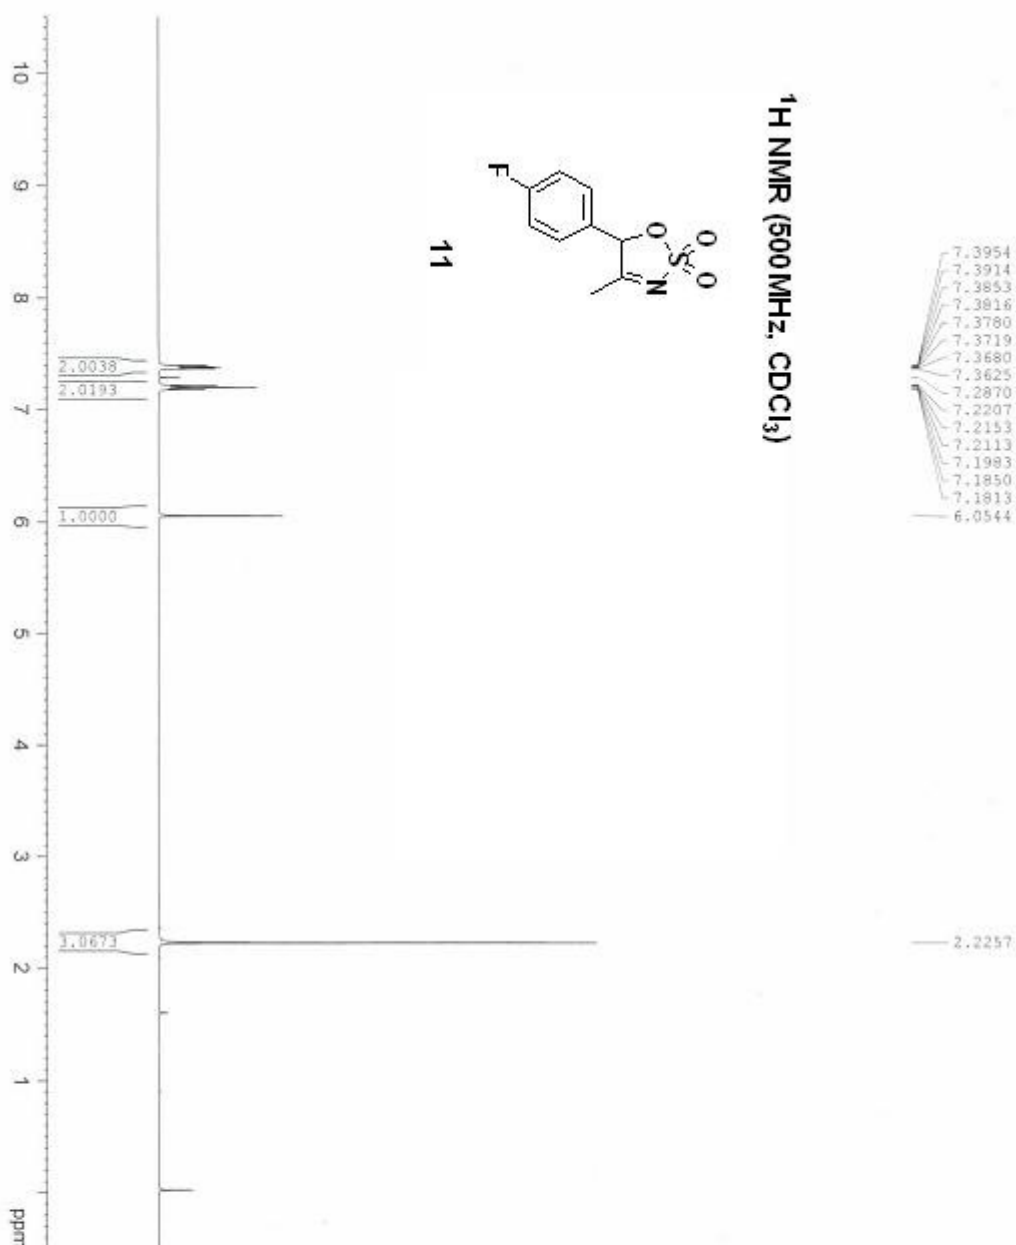

```

NAME KSY_111202_4F_imine
EXPNO 1
PROCNO 1
Date_ 20111202
Time 15:22
INSTRUM spect
PROBHD 5 mm DUL 13C-1
PULPROG zg30
TD 65536
SOLVENT CDCl3
NS 16
DS 2
SWH 7507.507 Hz
FIDRES 0.114555 Hz
AQ 4.3648143 sec
RG 181
DW 66.600 usec
DE 6.00 usec
TE 298.1 K
D1 1.00000000 sec
TD0 1

===== CHANNEL f1 =====
NUC1 1H
P1 9.80 usec
PL1 -1.90 dB
PL1W 27.23316002 W
SFO1 500.1332508 MHz
SI 32768
SF 500.1300000 MHz
WDW EM
SSB 0
LB 0.30 Hz
GB 0
PC 1.00
  
```

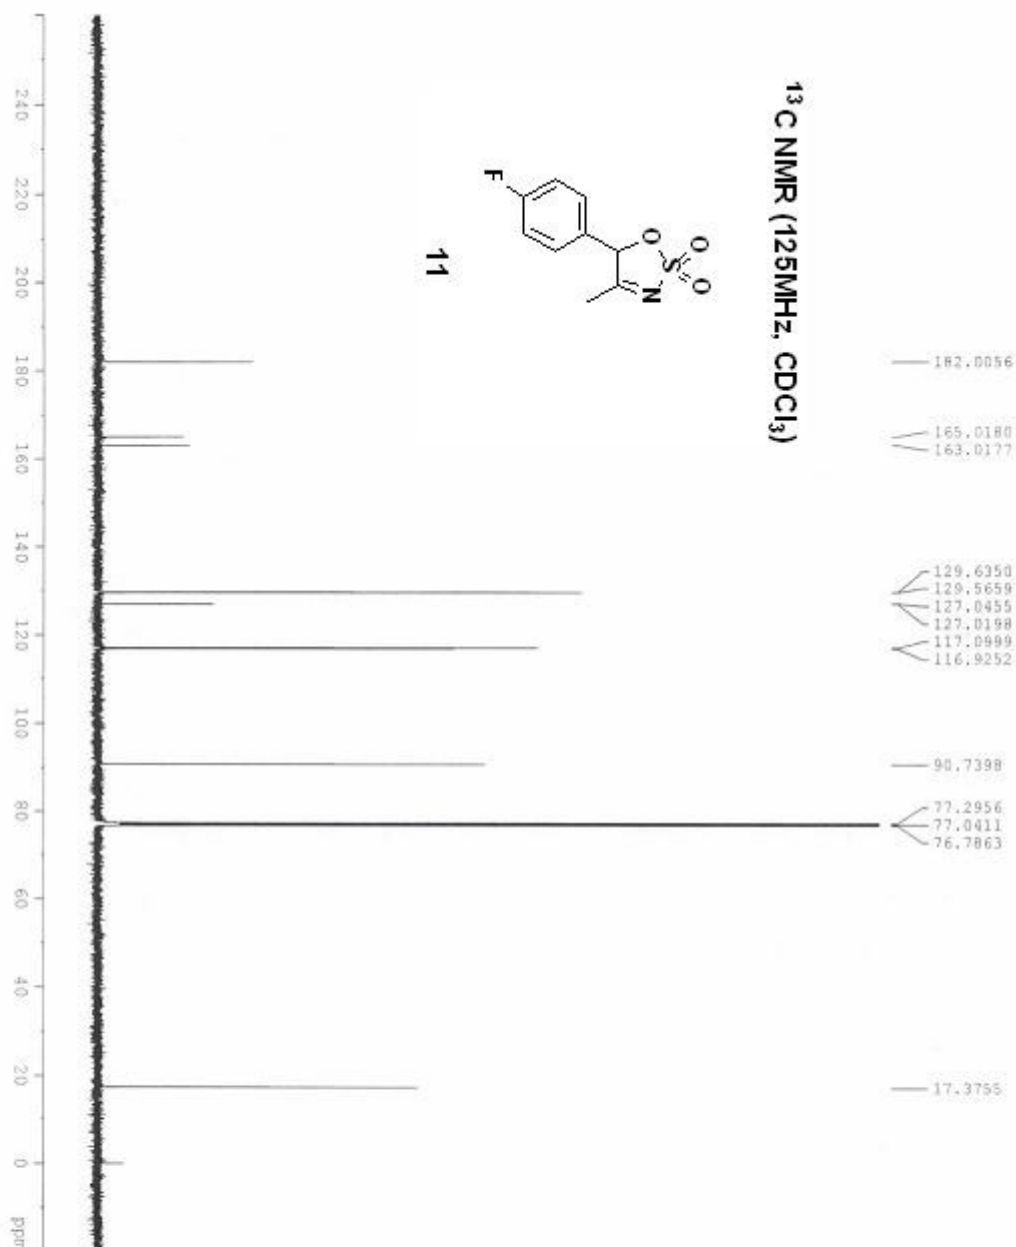

```

NAME          KEY_111202_4F_1h_C
EXPNO         1
PROCNO        1
Date_         20111202
Time_         18.51
INSTRUM       spect
PROBHD        5 mm DUL 13C-1
PULPROG       zgpg30
TD             65536
SOLVENT       CDCl3
NS             512
DS             2
SWH            35211.276 Hz
FIDRES         0.537281 Hz
AQ             0.9306754 sec
RG             4096
DE             14.200 usec
TE             298.8 K
D1             2.00000000 sec
D11            0.03000000 sec
TD0            1

===== CHANNEL f1 =====
NUC1           13C
P1             8.00 usec
PL1            1.40 dB
PL1W           70.60439303 W
SFO1           125.7728799 MHz

===== CHANNEL f2 =====
NAME1216
PCPD2         1H
PCPD2         100.00 usec
PL2           -1.90 dB
PL12          16.00 dB
PL13          19.00 dB
PL1W           27.23316002 W
PL12W          0.44167015 W
PL13W          0.22136943 W
SFO2           500.1320005 MHz
SI            32768
SF            125.7577690 MHz
MEW           28
SSB           0
LB            1.00 Hz
GB            0
PC            1.40
  
```



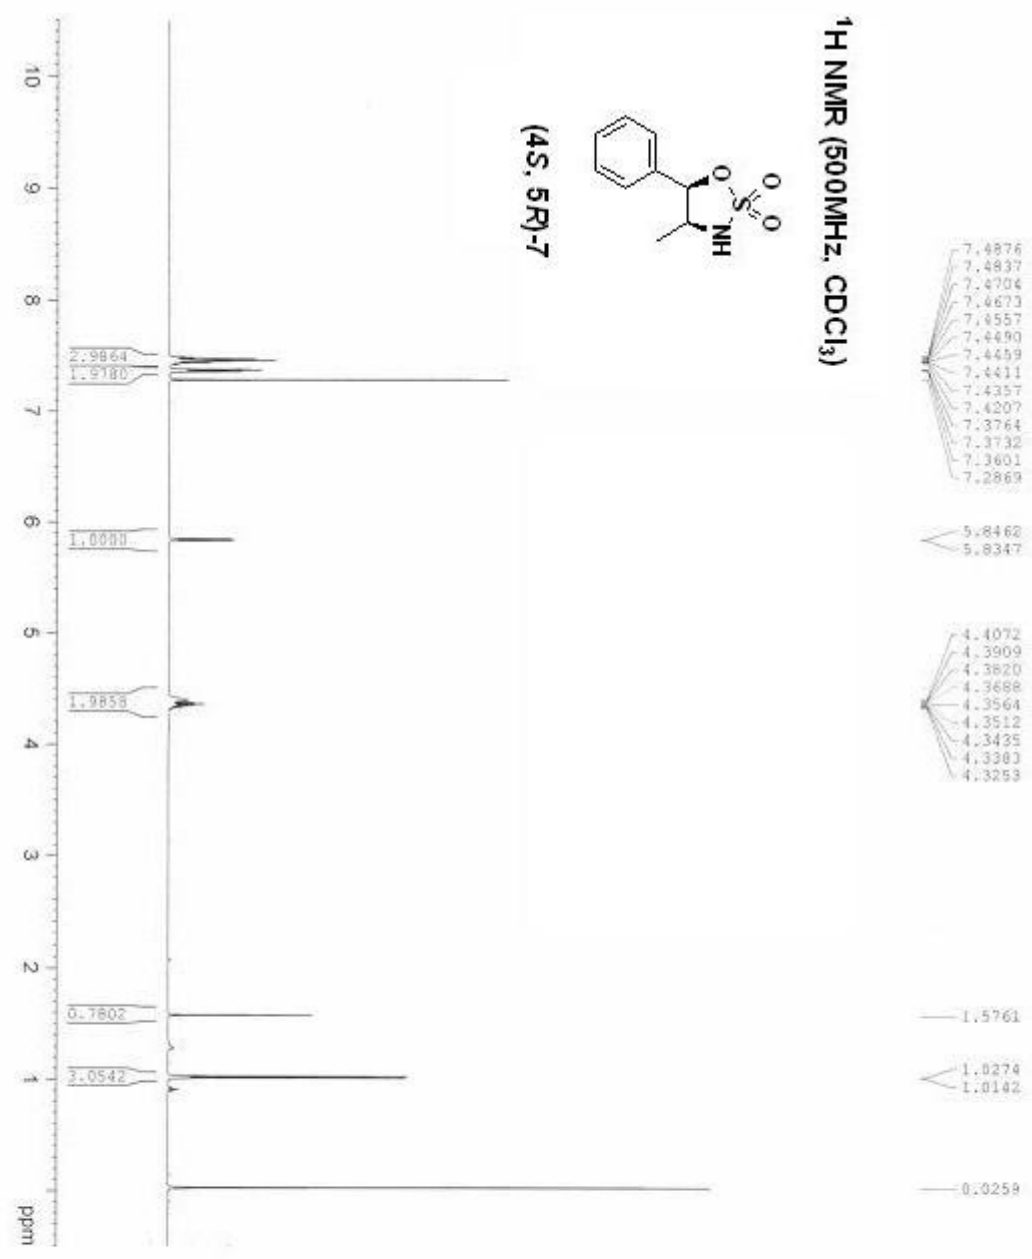

```

NAME      KSY_111129_NH
EXPNO     2
PROCNO    1
Date_     20111129
Time      16.08
INSTRUM   spect
PROBHD    5 mm DUL 13C-1
PULPROG   zg30
TD         65536
SOLVENT   CDCl3
NS         16
DS         2
SWH        7507.507 Hz
FIDRES     0.114555 Hz
AQ         4.3648143 sec
RG         574.7
DW         68.600 usec
DE         6.00 usec
TE         296.5 K
D1         1.00000000 sec
TD0        1

===== CHANNEL f1 =====
NUC1       1H
P1         9.80 usec
PL1        -1.90 dB
PL1W       27.23316002 W
SFO1       500.1332508 MHz
SI         32768
SF         500.1300000 MHz
WDW        EM
SSB        0
LB         0.30 Hz
GB         0
PC         1.00

```

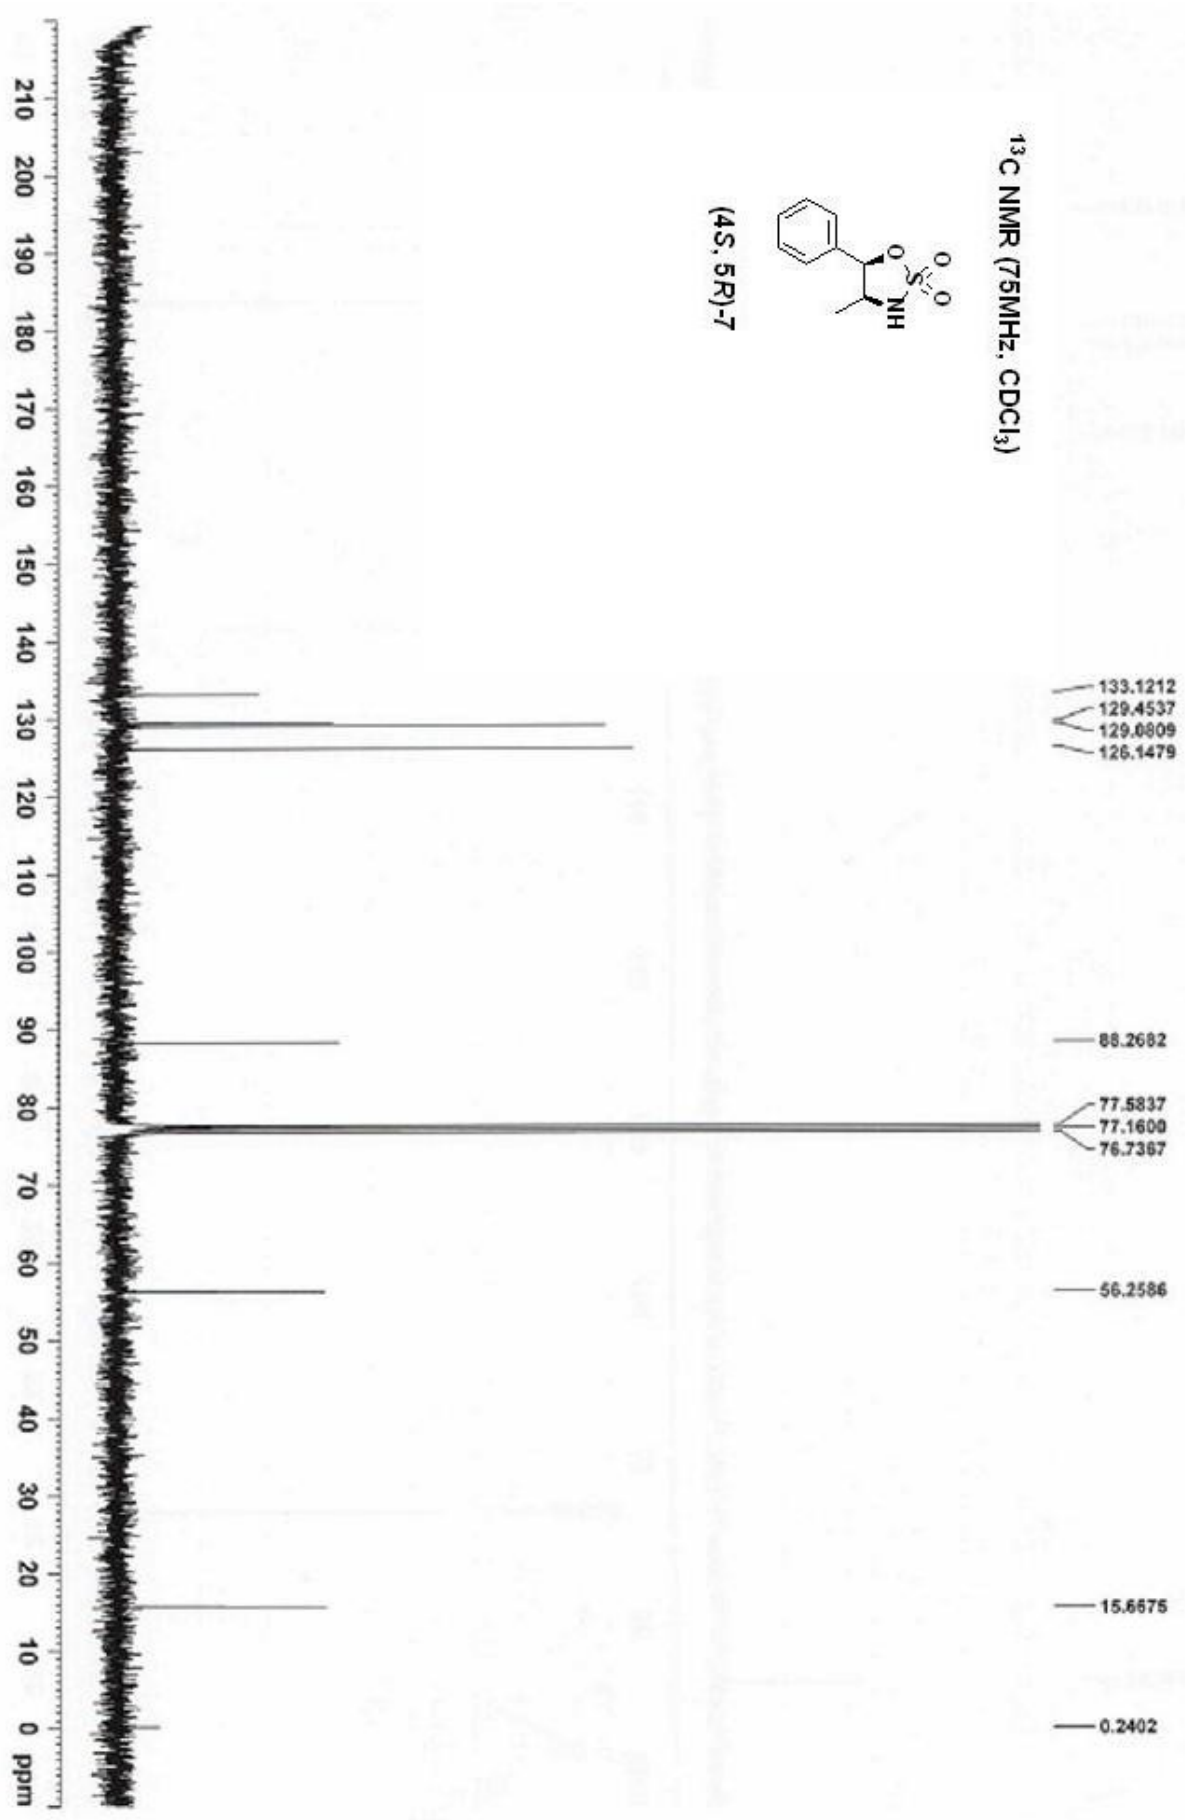

**<sup>1</sup>H NMR (500MHz, CDCl<sub>3</sub>)**

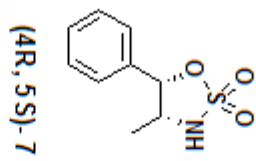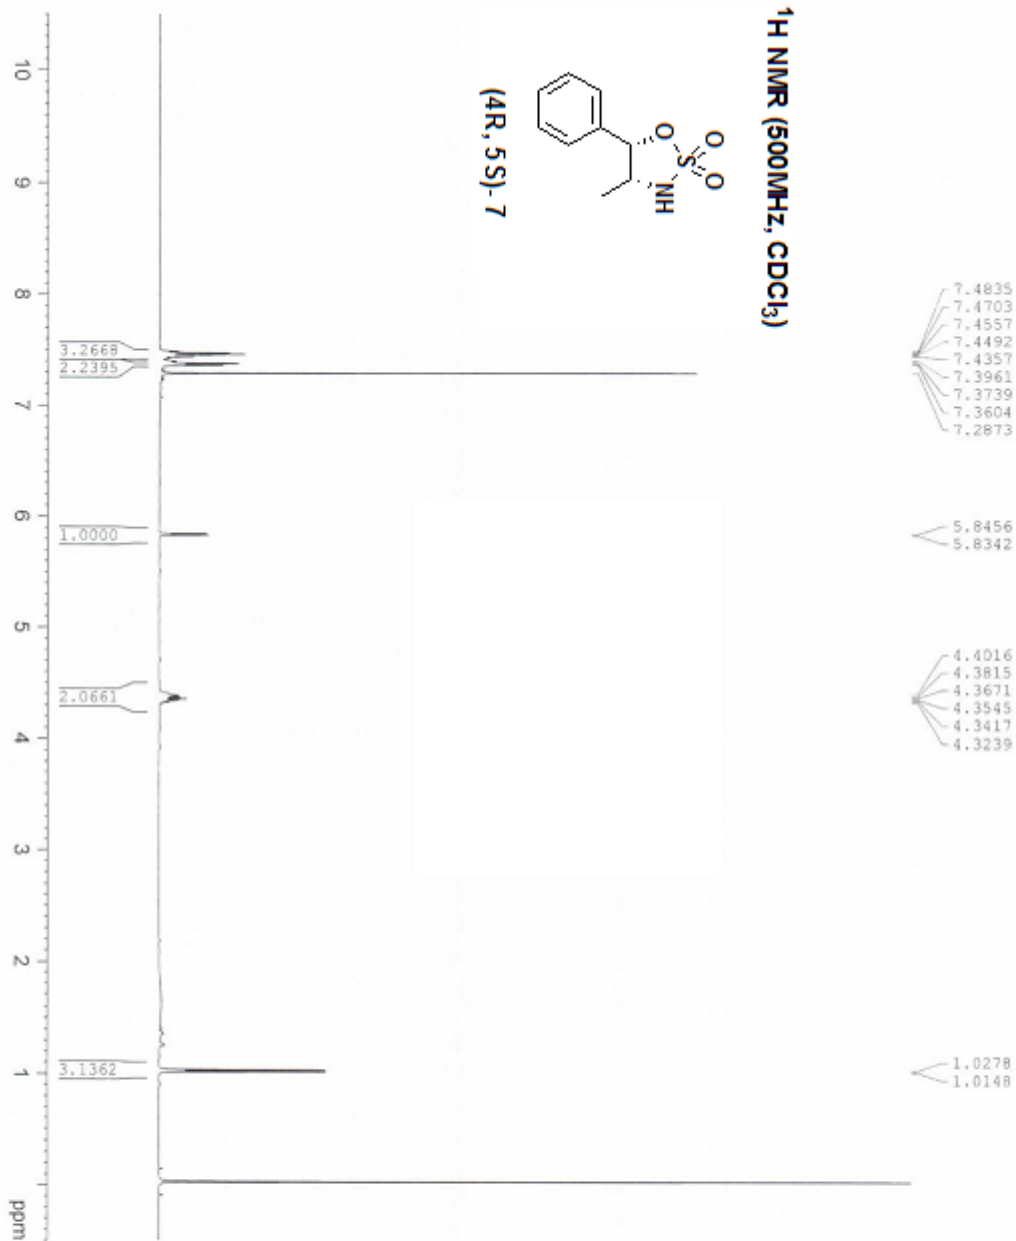

```

NAME      KSY_111004_NH
EXPNO     1
PROCNO    1
Date_     20111004
Time      16.39
INSTRUM   spect
PROBHD    5 mm DUL 13C-1
PULPROG   zg30
TD         65536
SOLVENT   CDCl3
NS         16
DS         2
SWH        7507.507 Hz
FIDRES     0.114555 Hz
AQ         4.3648143 sec
RG         574.7
DW         66.600 usec
DE         6.00 usec
TE         299.2 K
D1         1.00000000 sec
TD0        1

===== CHANNEL f1 =====
NUC1       1H
P1         9.80 usec
PL1        -1.90 dB
PL1W       27.23316002 W
SFO1       500.1332508 MHz
SI         32768
SF         500.1300000 MHz
WDW        EM
SSB        0
LB         0.30 Hz
GB         0
PC         1.00
  
```

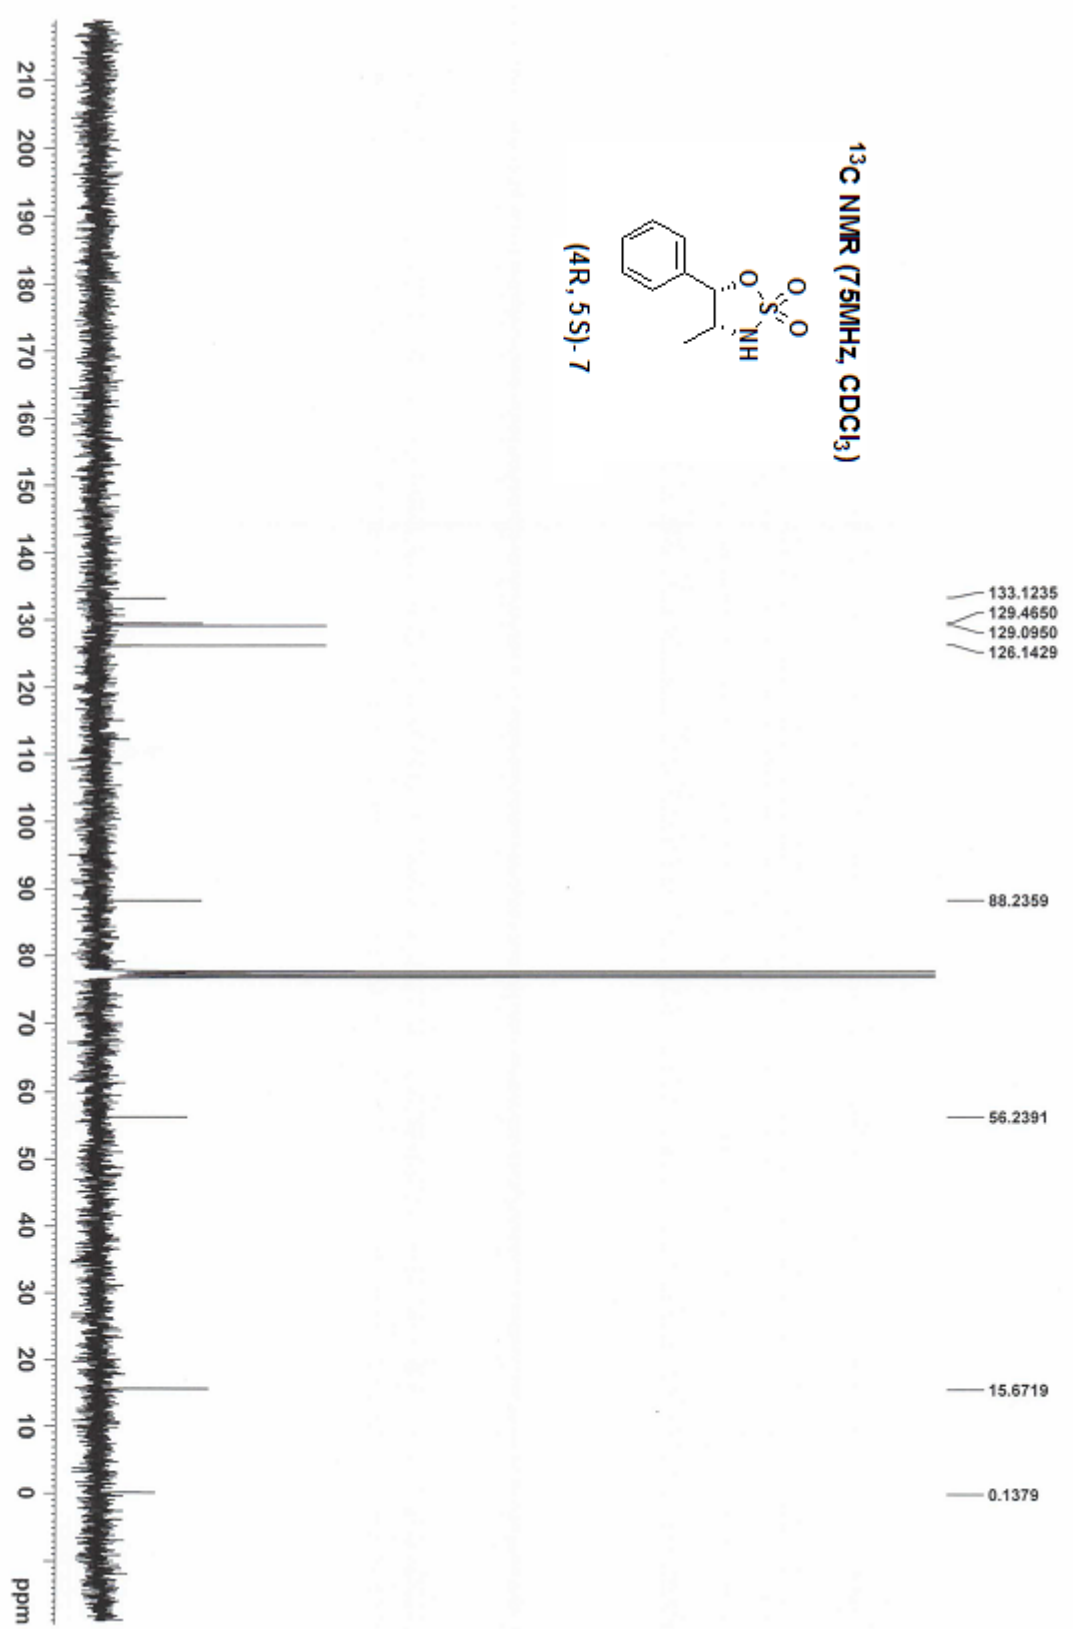

**<sup>1</sup>H NMR (500 MHz, CDCl<sub>3</sub>)**

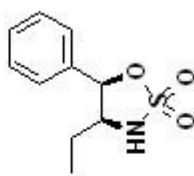

**(4S, 5R)-15**

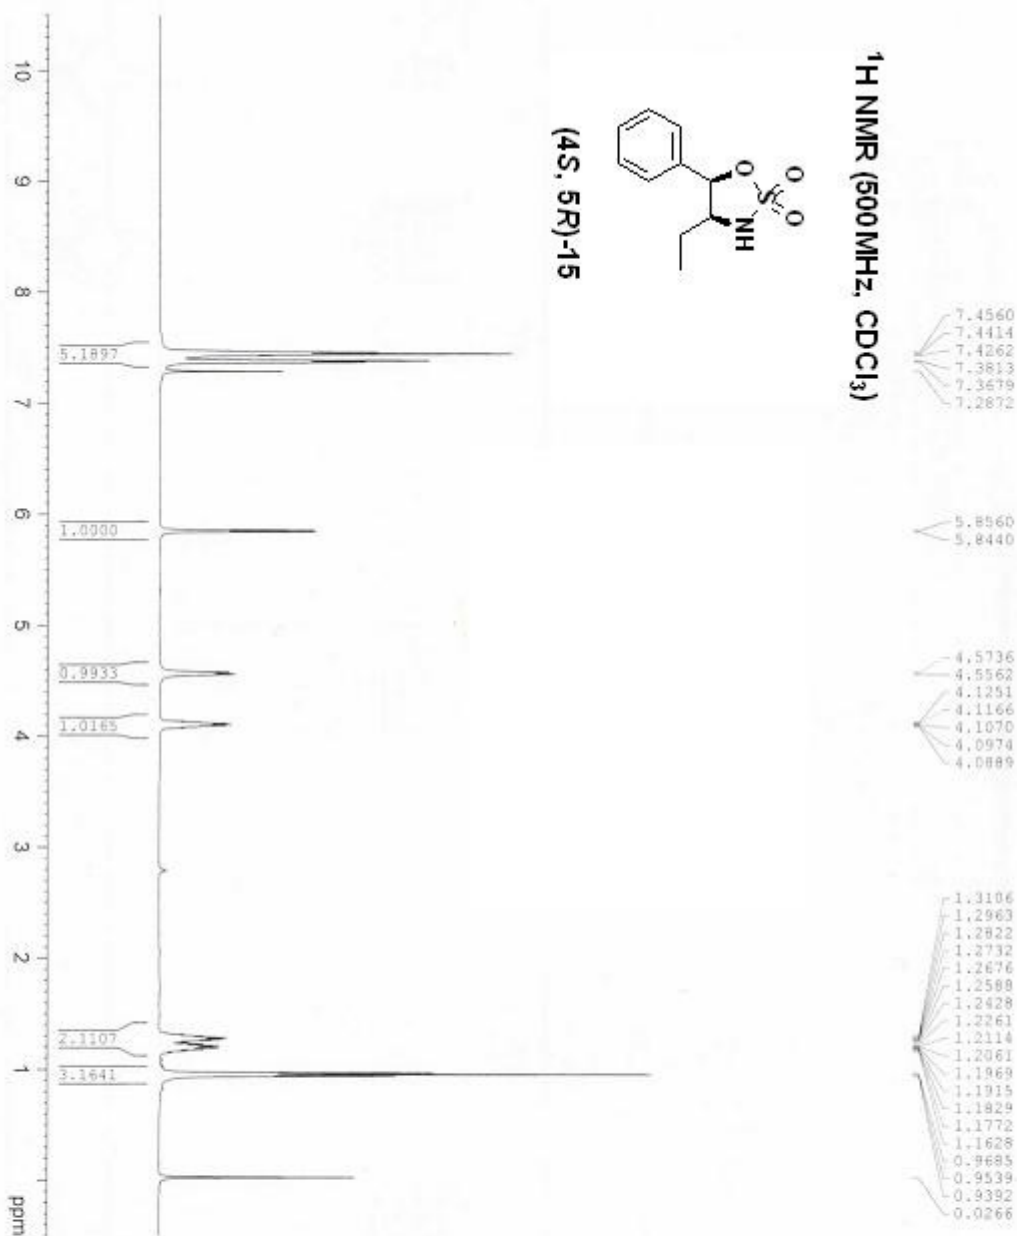

```

NAME KSY_111124_Et_Am
EXPNO 1
PROCNO 1
Date_ 20111124
Time 14.05
INSTRUM spect
PROBHD 5 mm DUL 13C-1
PULPROG zg30
TD 65536
SOLVENT CDCl3
NS 4
DS 2
SWH 7507.507 Hz
FIDRES 0.114555 Hz
AQ 4.3648143 sec
RG 256
DE 66.600 usec
TE 298.0 K
D1 1.00000000 sec
TD0 1

===== CHANNEL f1 =====
NUC1 1H
P1 9.80 usec
PL1 -1.90 dB
PL1W 27.23316002 W
SFO1 500.1332508 MHz
SI 32768
SF 500.1300000 MHz
WDW EM
SSB 0
LB 0.30 Hz
GB 0
PC 1.00
  
```

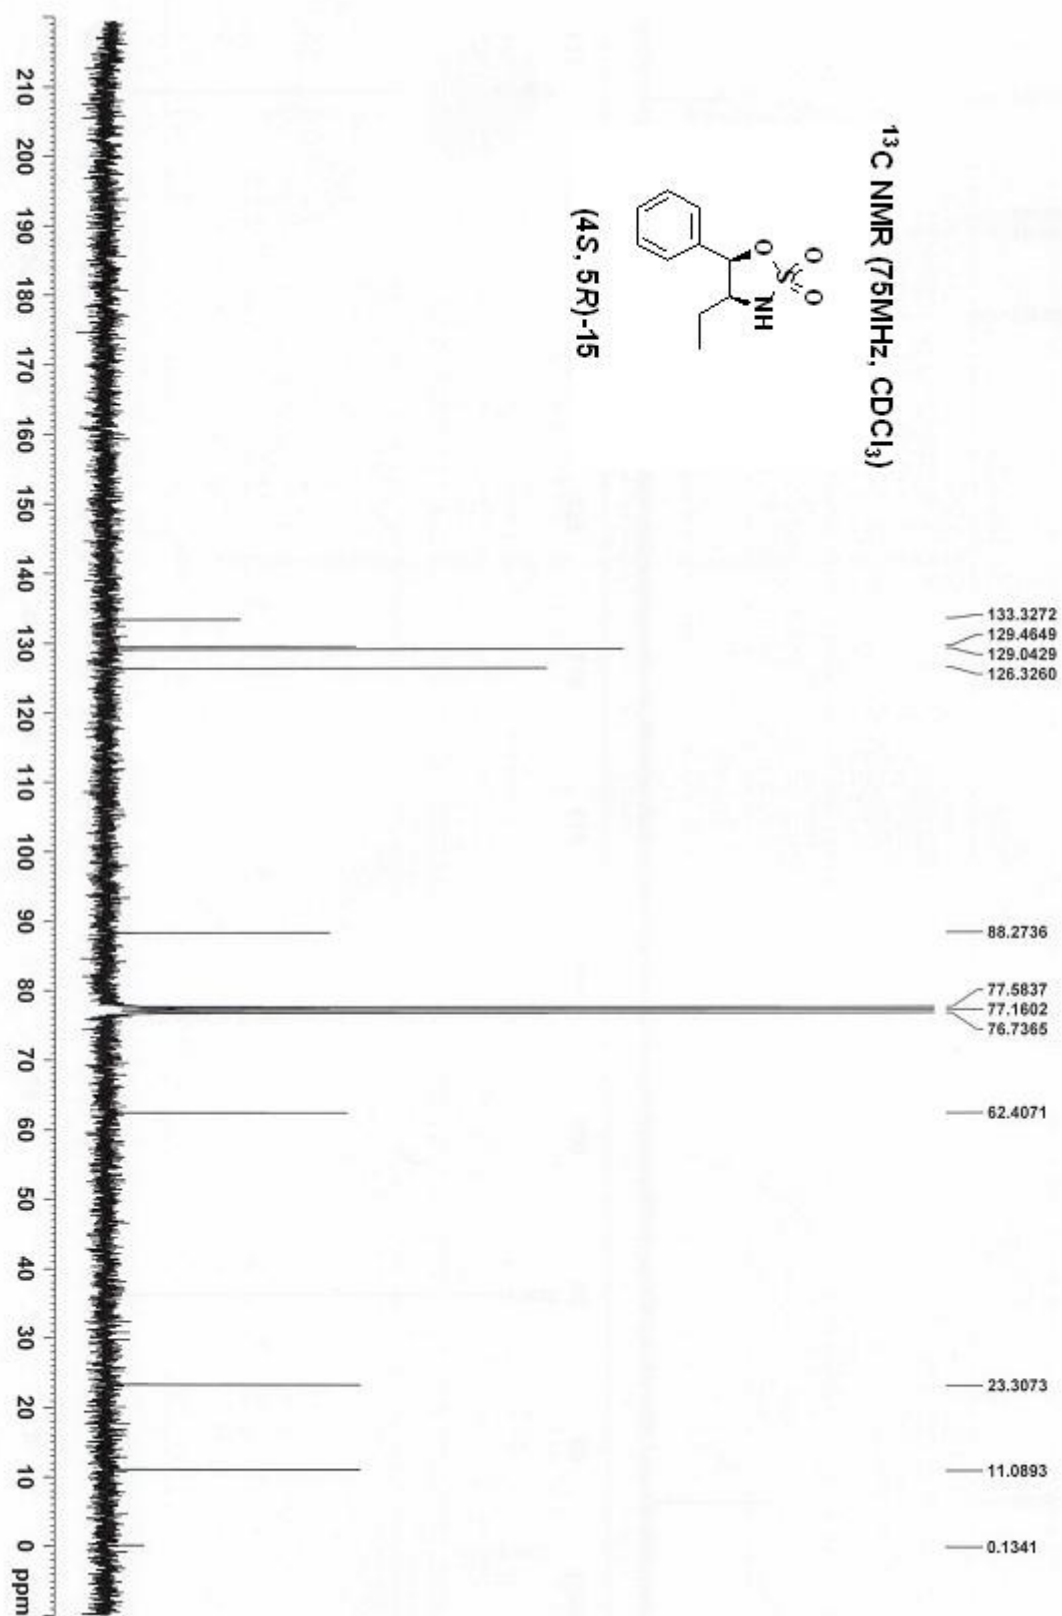

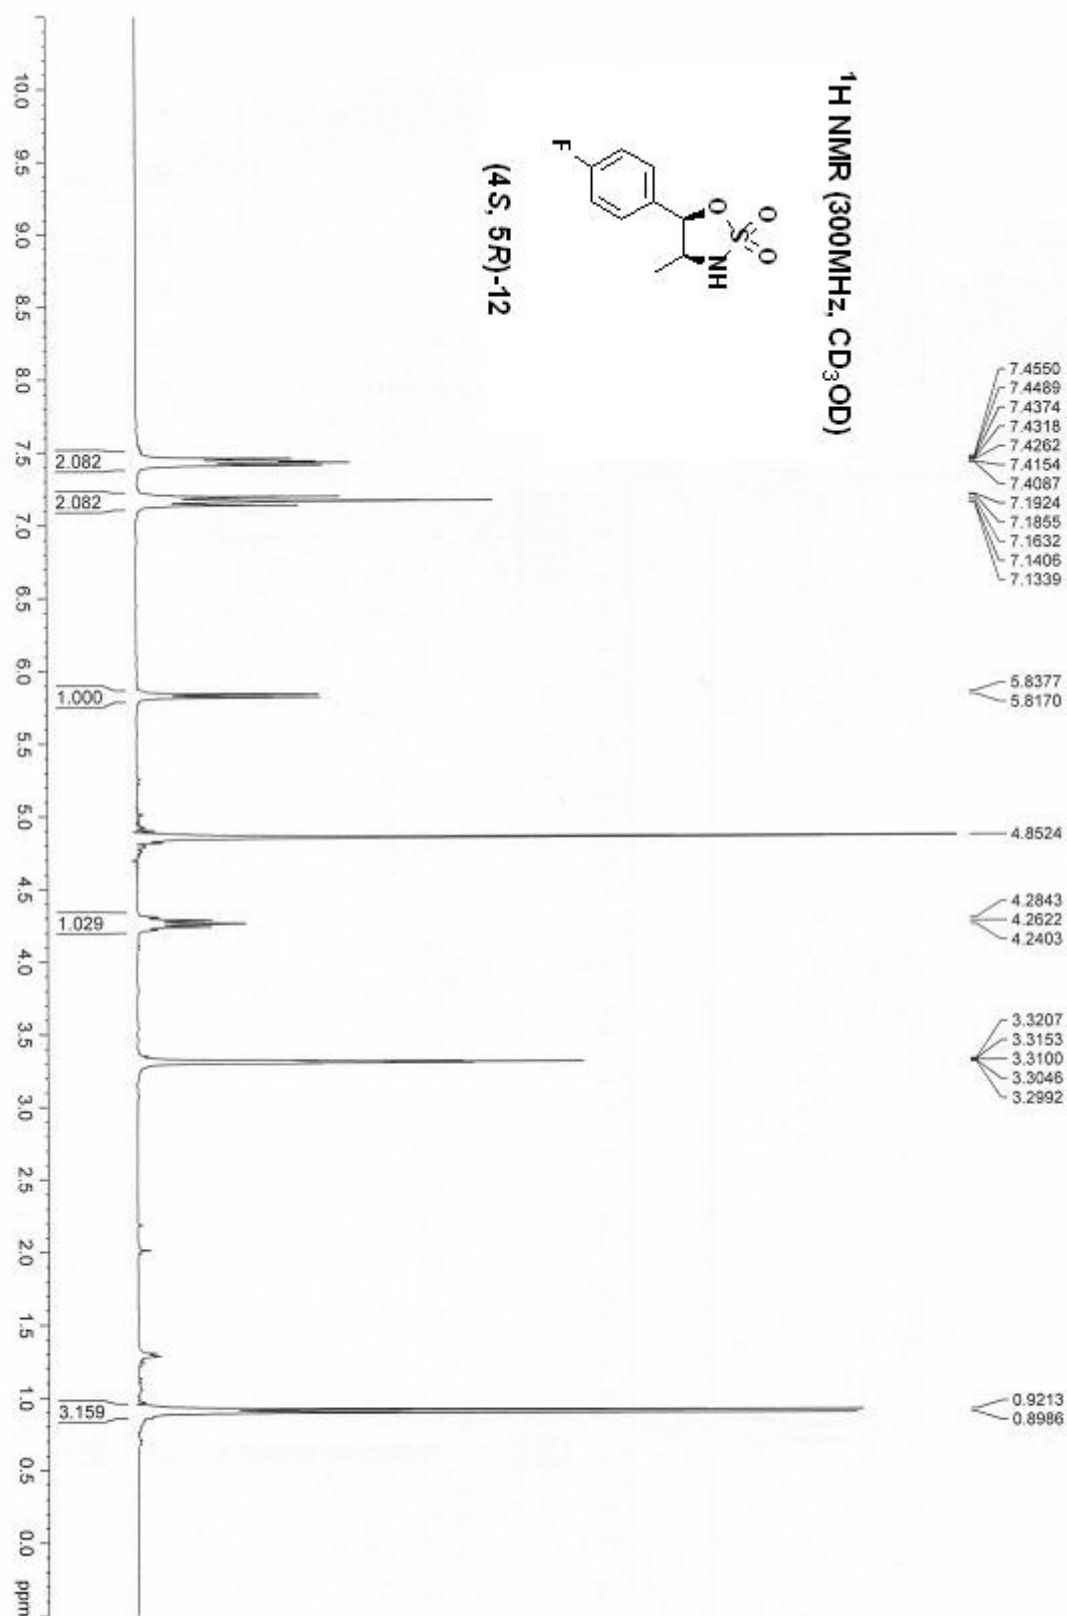

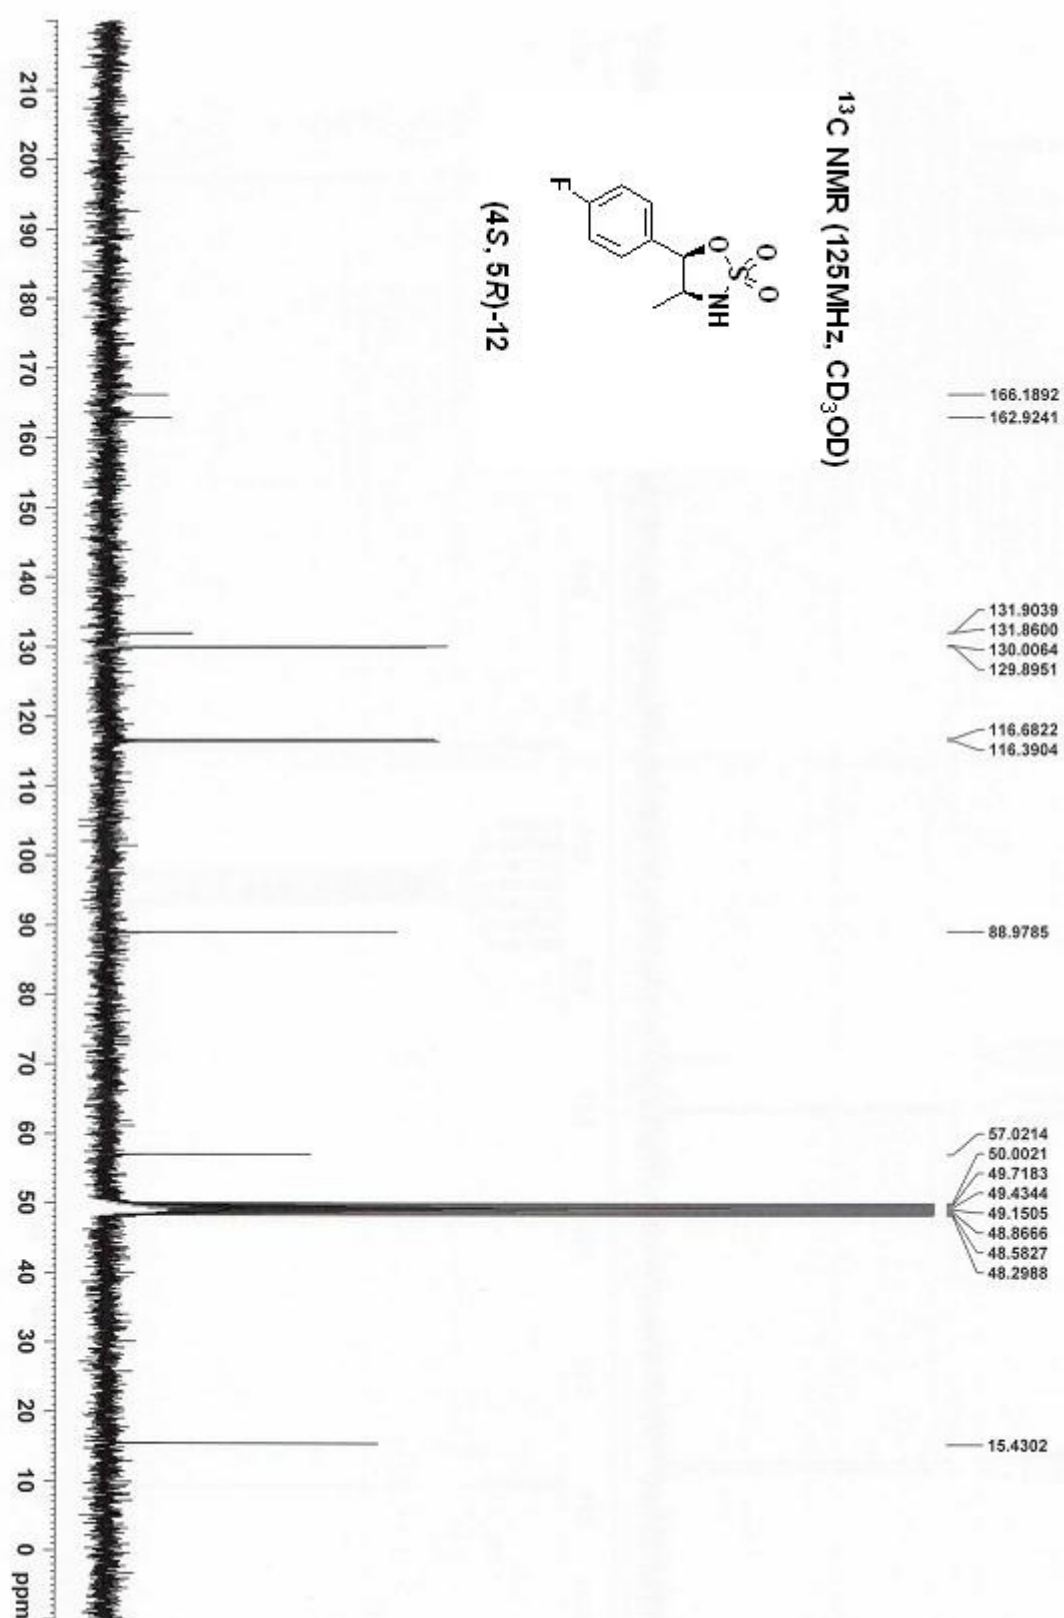



7.3661  
7.3793  
7.3668  
7.3540  
7.3233  
7.3188  
7.3118  
7.3062  
7.2997  
7.2936  
7.2874

4.5718  
4.5623

3.2572  
3.2542  
3.2444  
3.2319  
3.2286

1.0021  
0.9891

<sup>1</sup>H NMR (500 MHz, CDCl<sub>3</sub>)

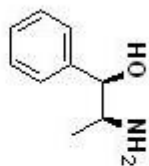

(1R,2S)-1a

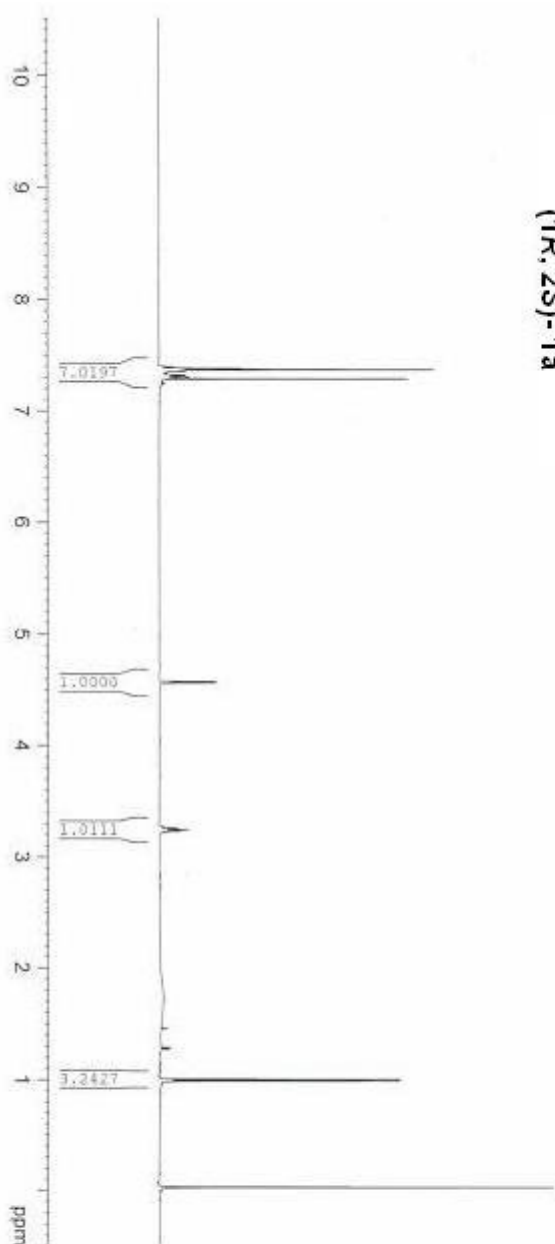

```

NAME      KSY 111007
EXPNO     1
PROCNO    1
Date_     20111007
Time      14.05
INSTRUM   spect
PROBHD    5 mm DUL 13C-1
PULPROG   zg30
TD         65536
SOLVENT   CDCl3
NS         4
DS         2
SWH        7507.507 Hz
FIDRES     0.11455 Hz
AQ         4.3648143 sec
RG         574.7
DW         66.600 usec
DE         6.00 usec
TE         299.0 K
D1         1.00000000 sec
TD0        1

===== CHANNEL f1 =====
NUC1       1H
P1         9.80 usec
PL1        -1.50 dB
PL1W       27.2316002 W
SFO1       500.1332508 MHz
SI         32768
SF         500.1300000 MHz
WDW        EM
SSB        0
LB         0.30 Hz
GB         0
PC         1.00
  
```

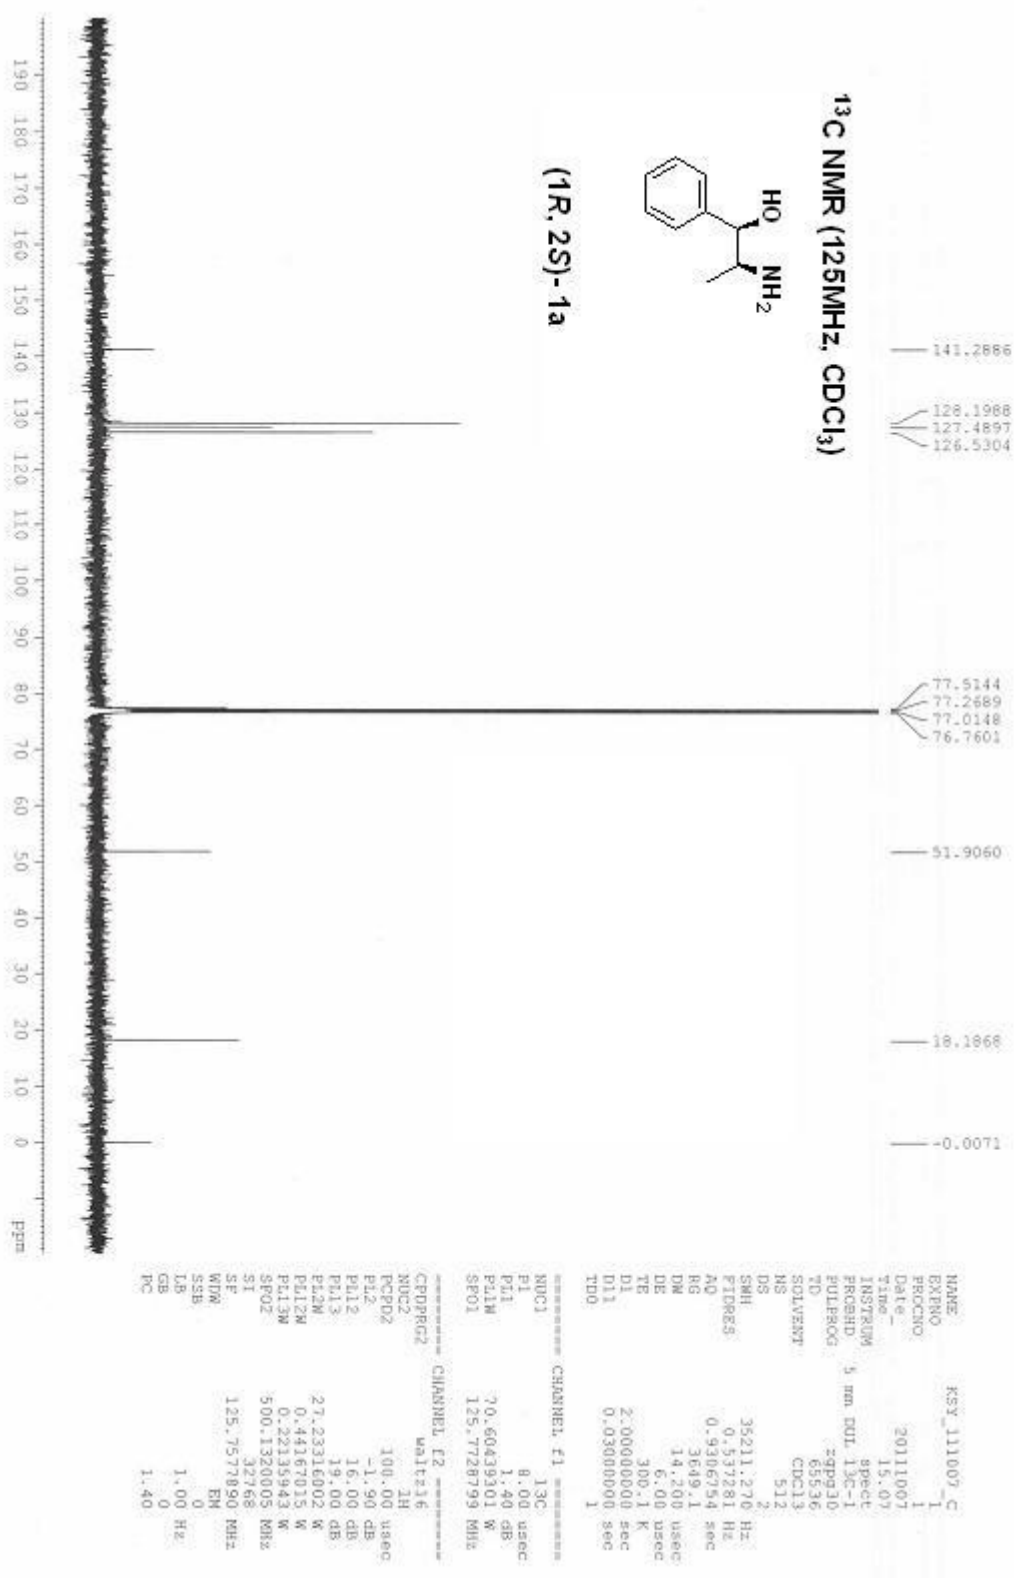

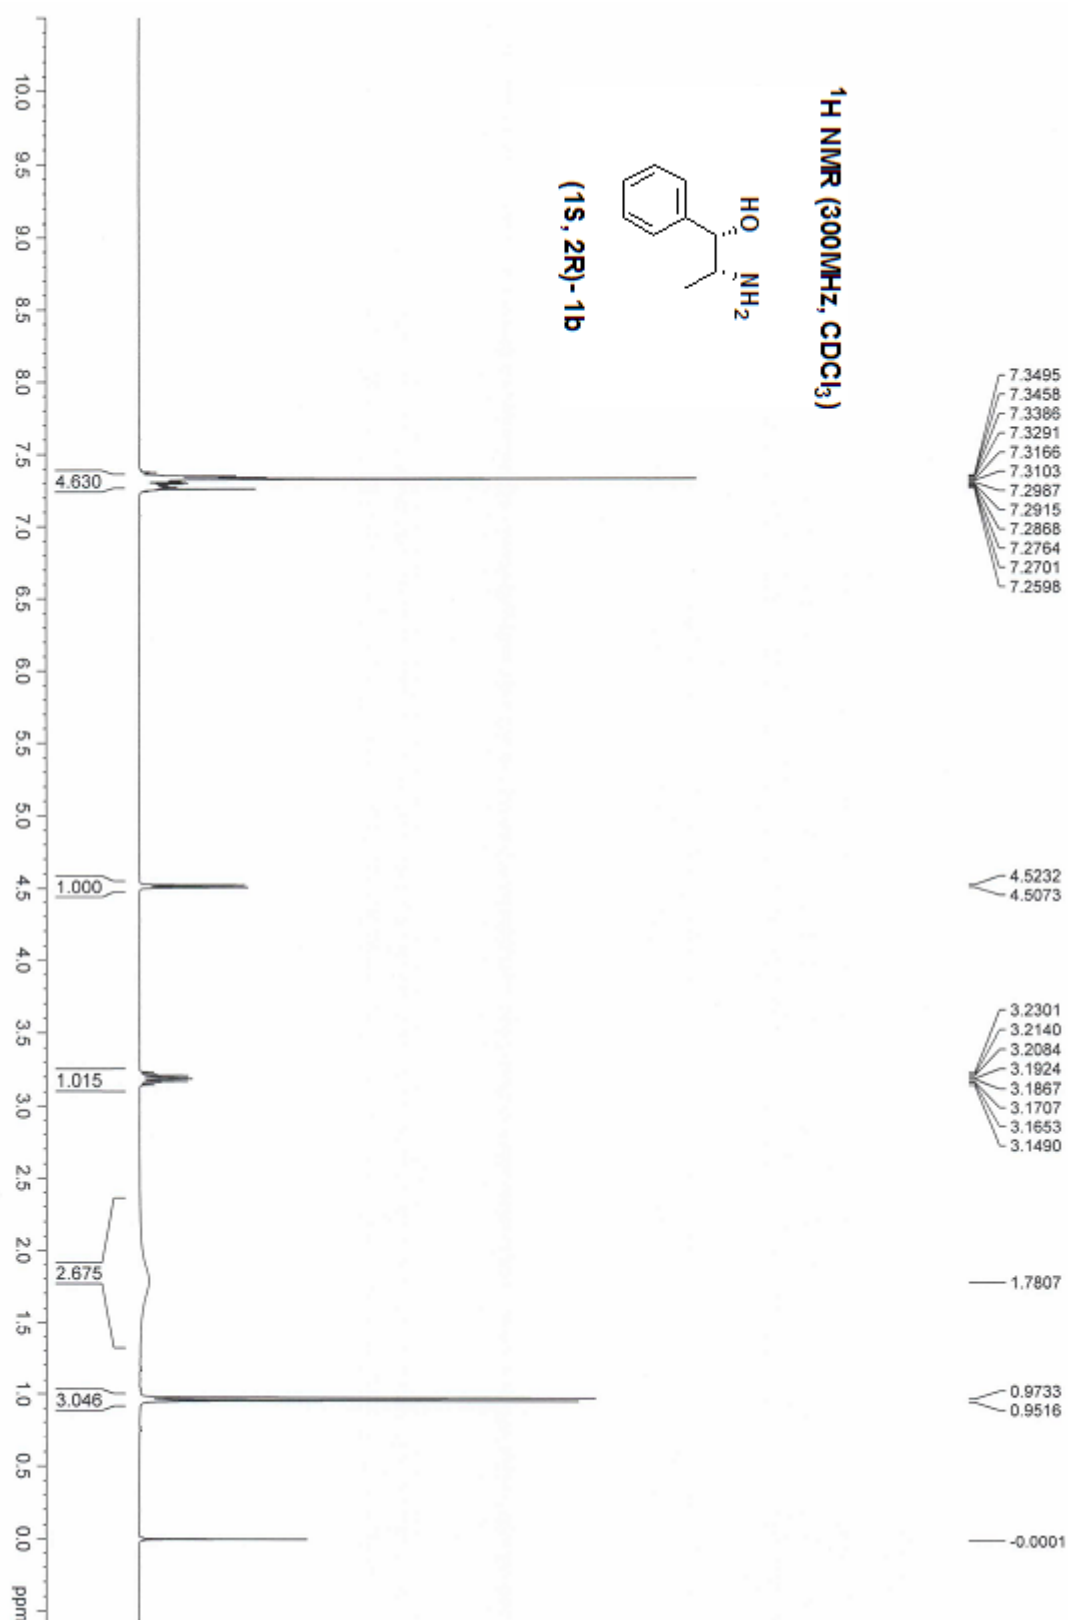

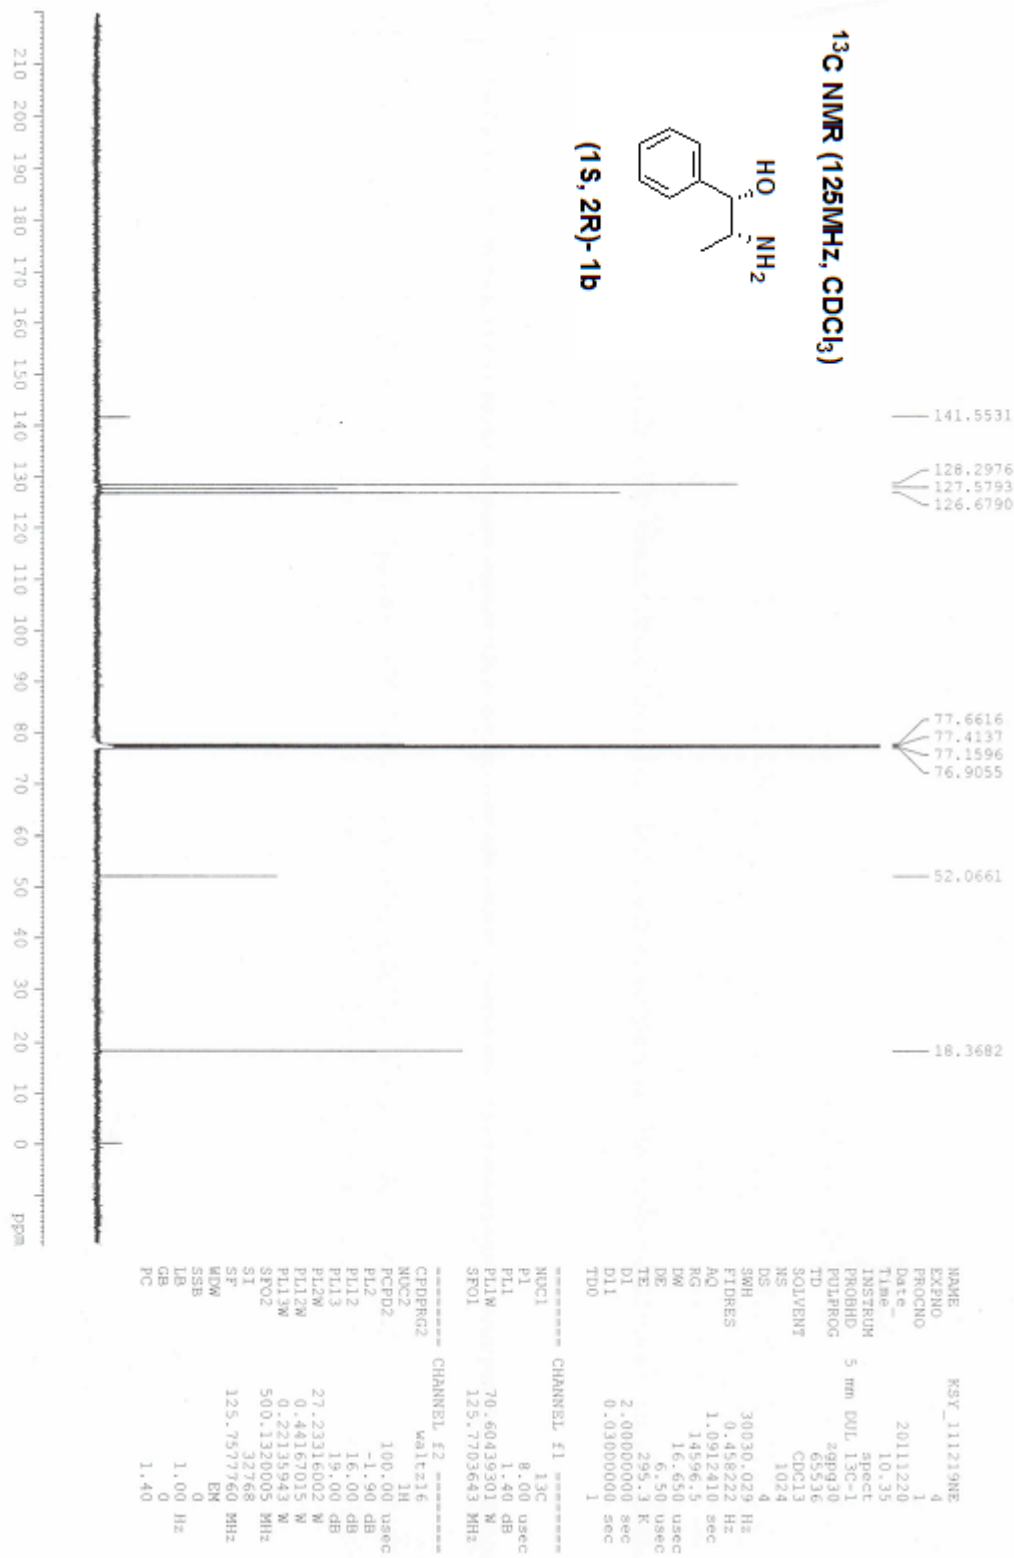

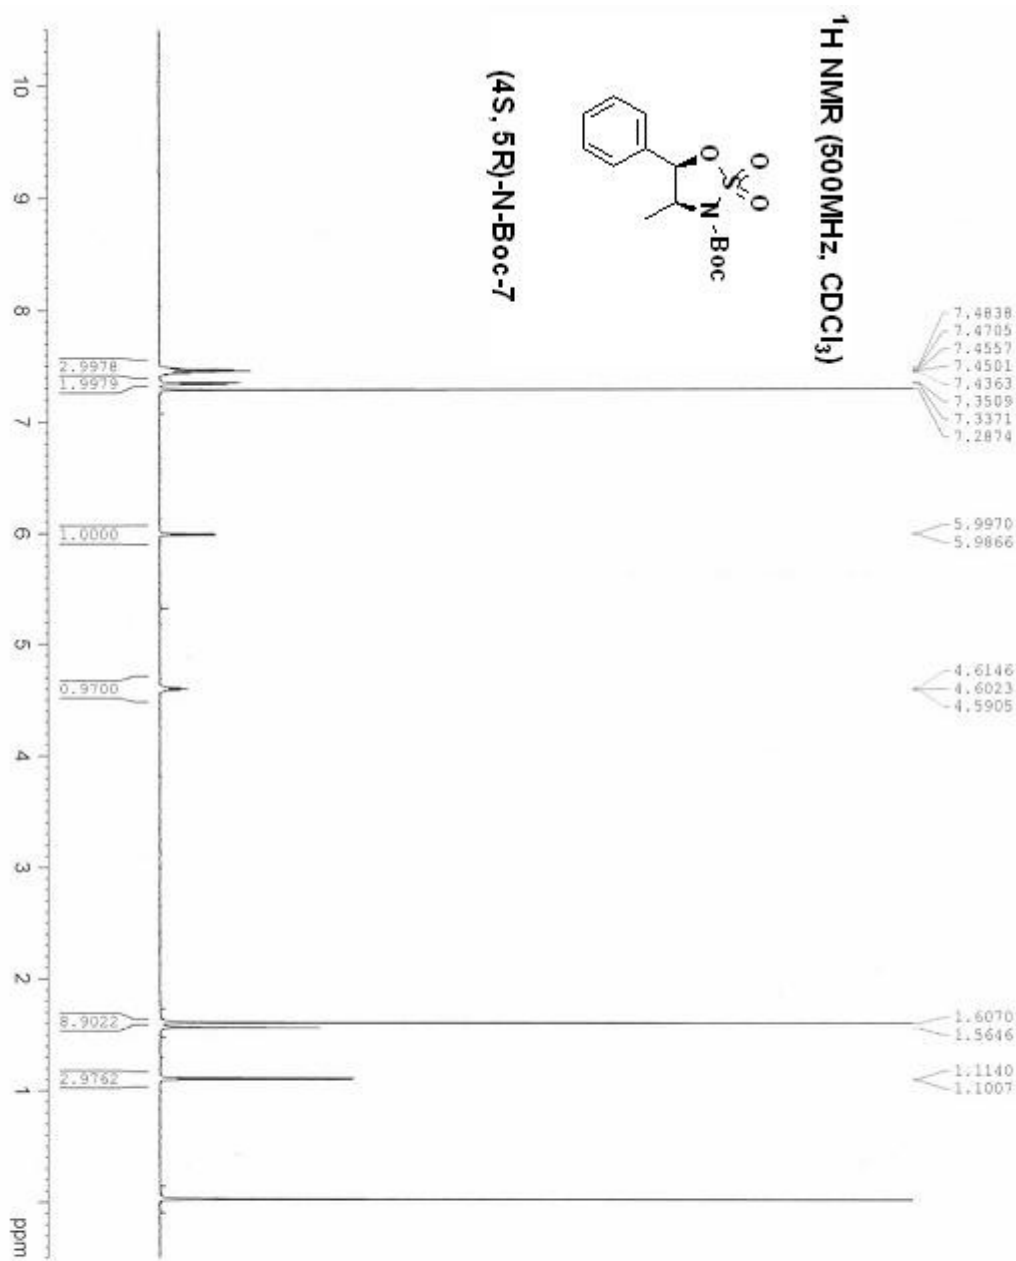

```

NAME      KSY_111004_NB
EXPNO     1
PROCNO    1
Date_     20111004
Time      16.03
INSTRUM   spect
PROBHD    5 mm DUL 13C-1
PULPROG   zg30
TD         65536
SOLVENT   CDCl3
NS         4
DS         2
SWH        7507.507 Hz
FIDRES     0.114555 Hz
AQ         4.3648143 sec
RG         574.7
DW         66.600 usec
DE         6.00 usec
TE         299.2 K
D1         1.00000000 sec
TD0        1
===== CHANNEL f1 =====
NUC1       1H
P1         9.80 usec
PL1        -1.90 dB
PL1W       27.23318002 W
SFO1       500.1332508 MHz
SI         32768
SF         500.1300000 MHz
WDW         EM
SSB         0
LB         0.30 Hz
GB         0
PC         1.00

```

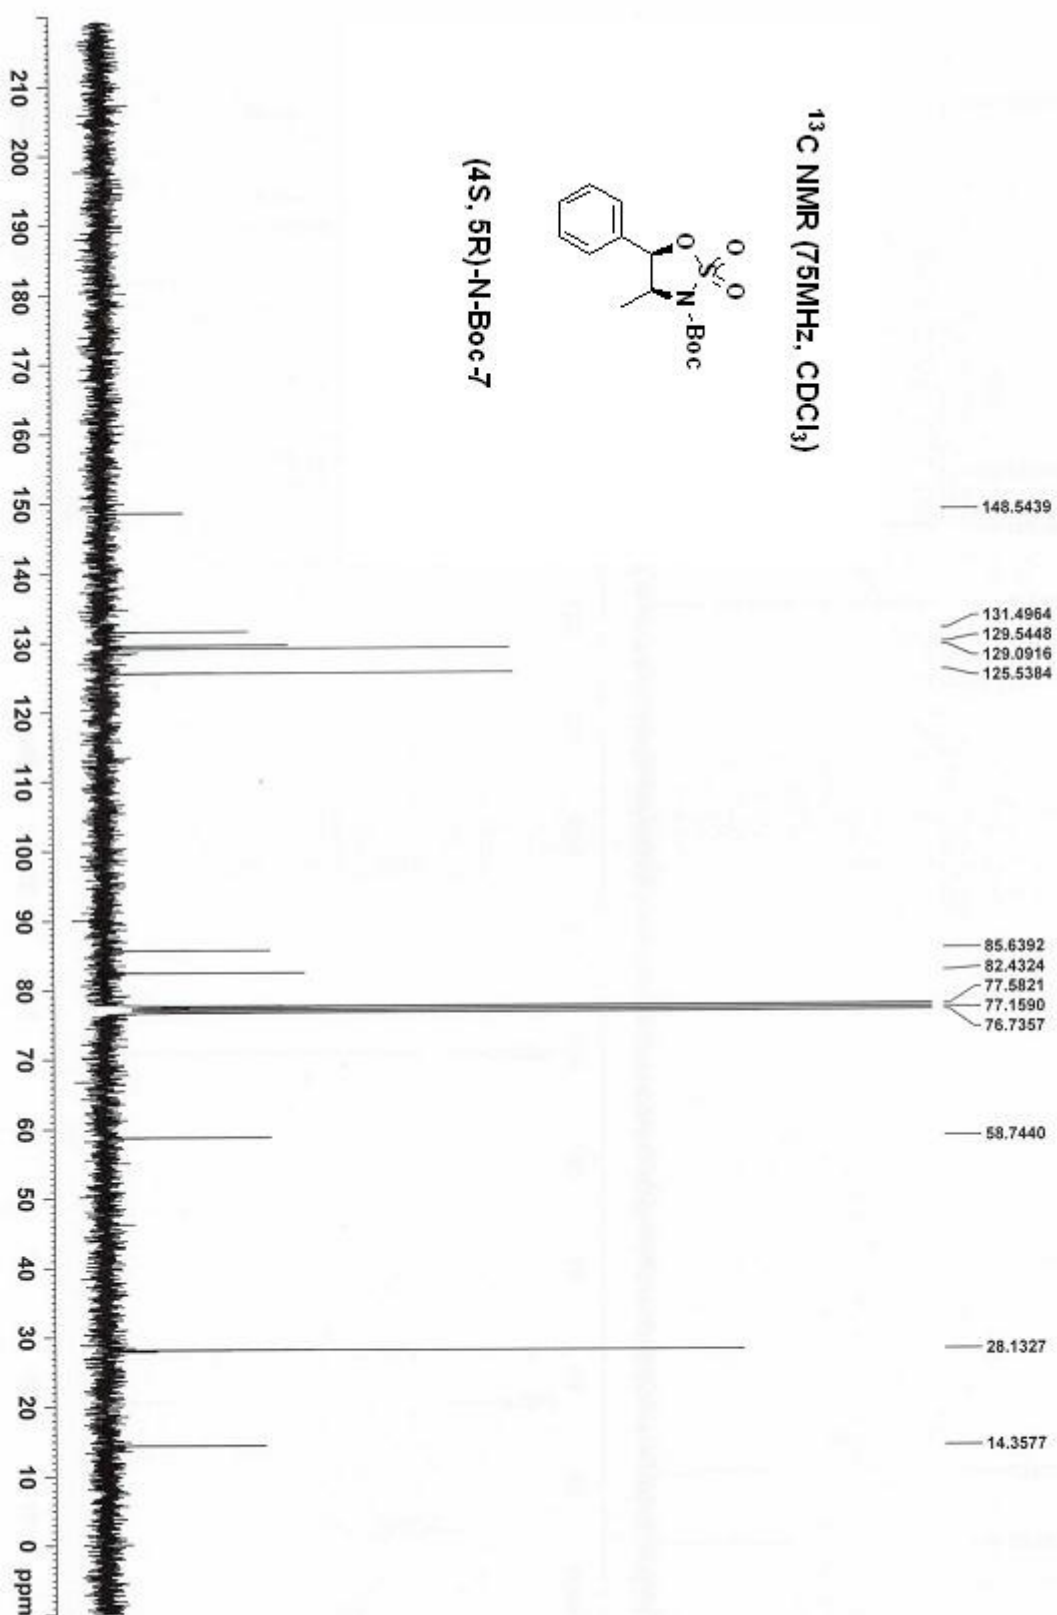

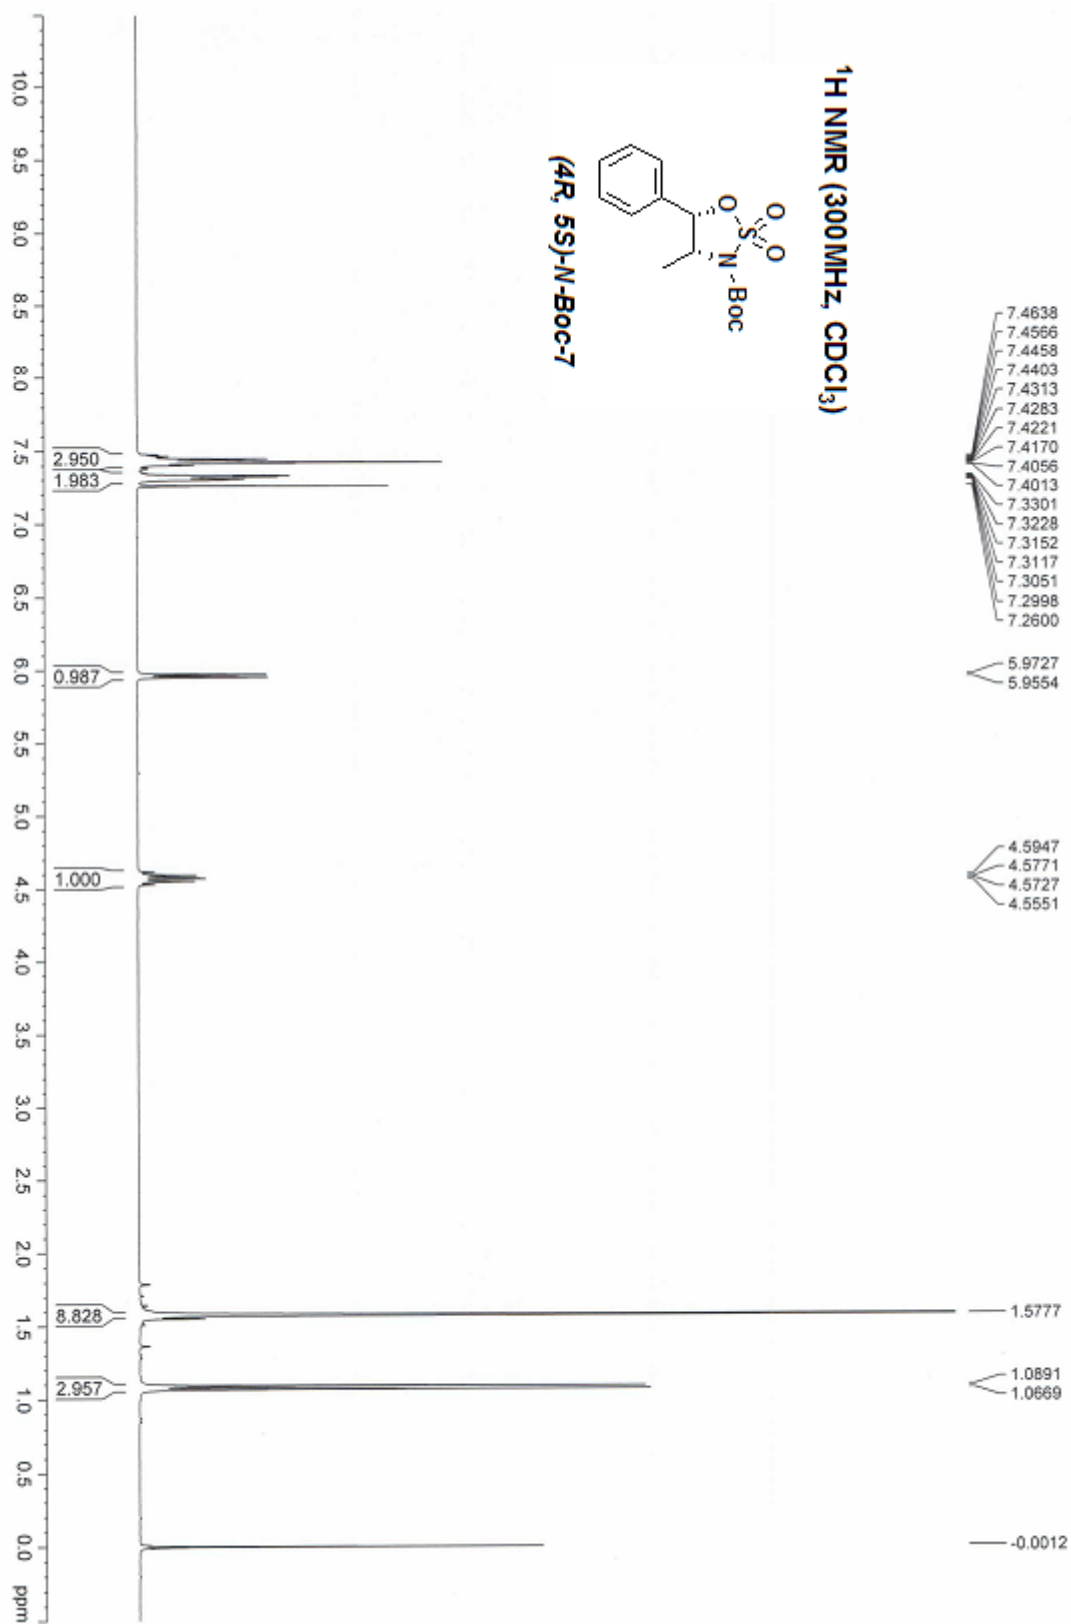

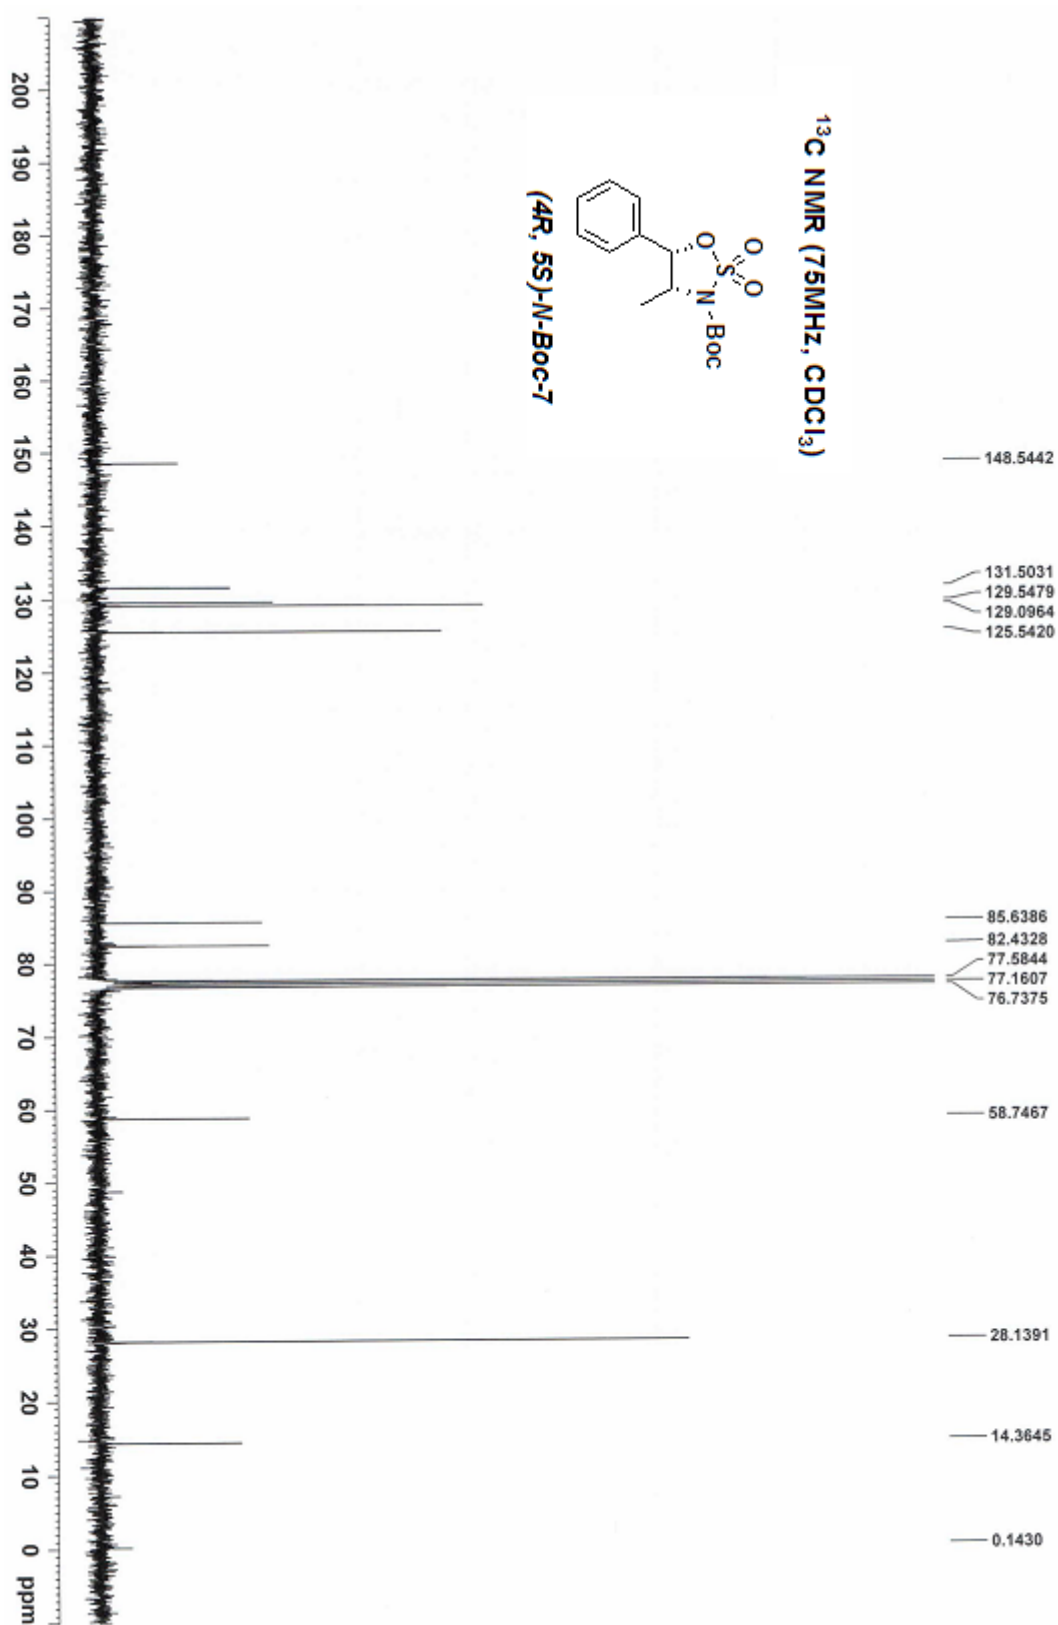



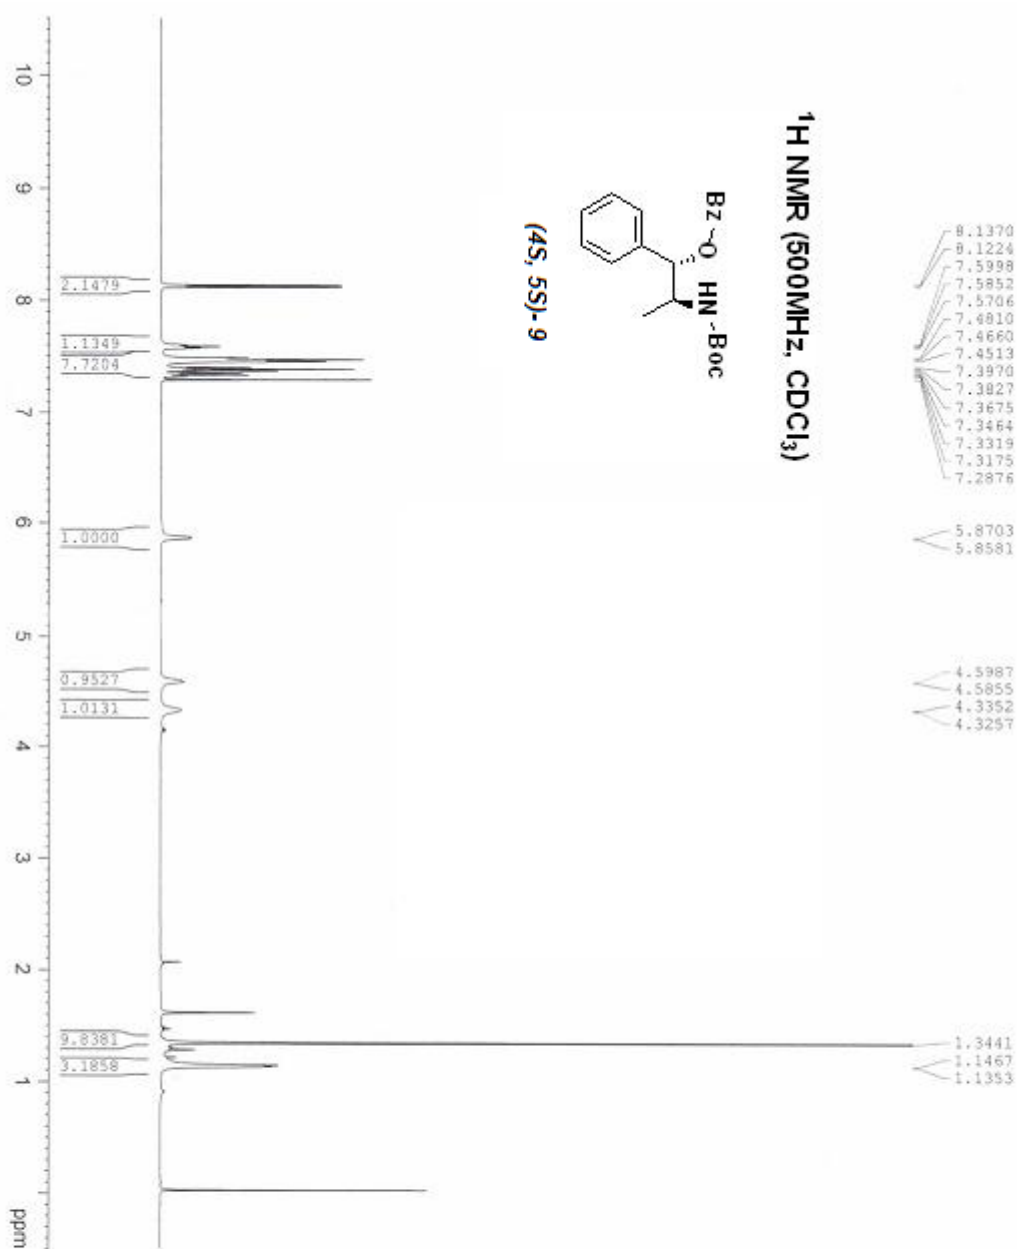

```

NAME      KSY_111004_Bz
EXPNO     1
PROCNO    1
Date_     20111004
Time      15.57
INSTRUM   spect
PROBHD    5 mm DUL-13C-1
PULPROG   zg30
TD         65536
SOLVENT   CDCl3
NS         8
DS         2
SWH        7507.507 Hz
FIDRES     0.114555 Hz
AQ         4.3648143 sec
RG         256
DW         66.600 usec
DE         6.00 usec
TE         299.2 K
D1         1.00000000 sec
TD0        1

===== CHANNEL f1 =====
NUC1       1H
P1         9.80 usec
PL1        -1.90 dB
PL1W       27.23316002 W
SFO1       500.1332508 MHz
SI         32768
SF         500.1300000 MHz
WDW        EM
SSB        0
LB         0.30 Hz
GB         0
PC         1.00
  
```

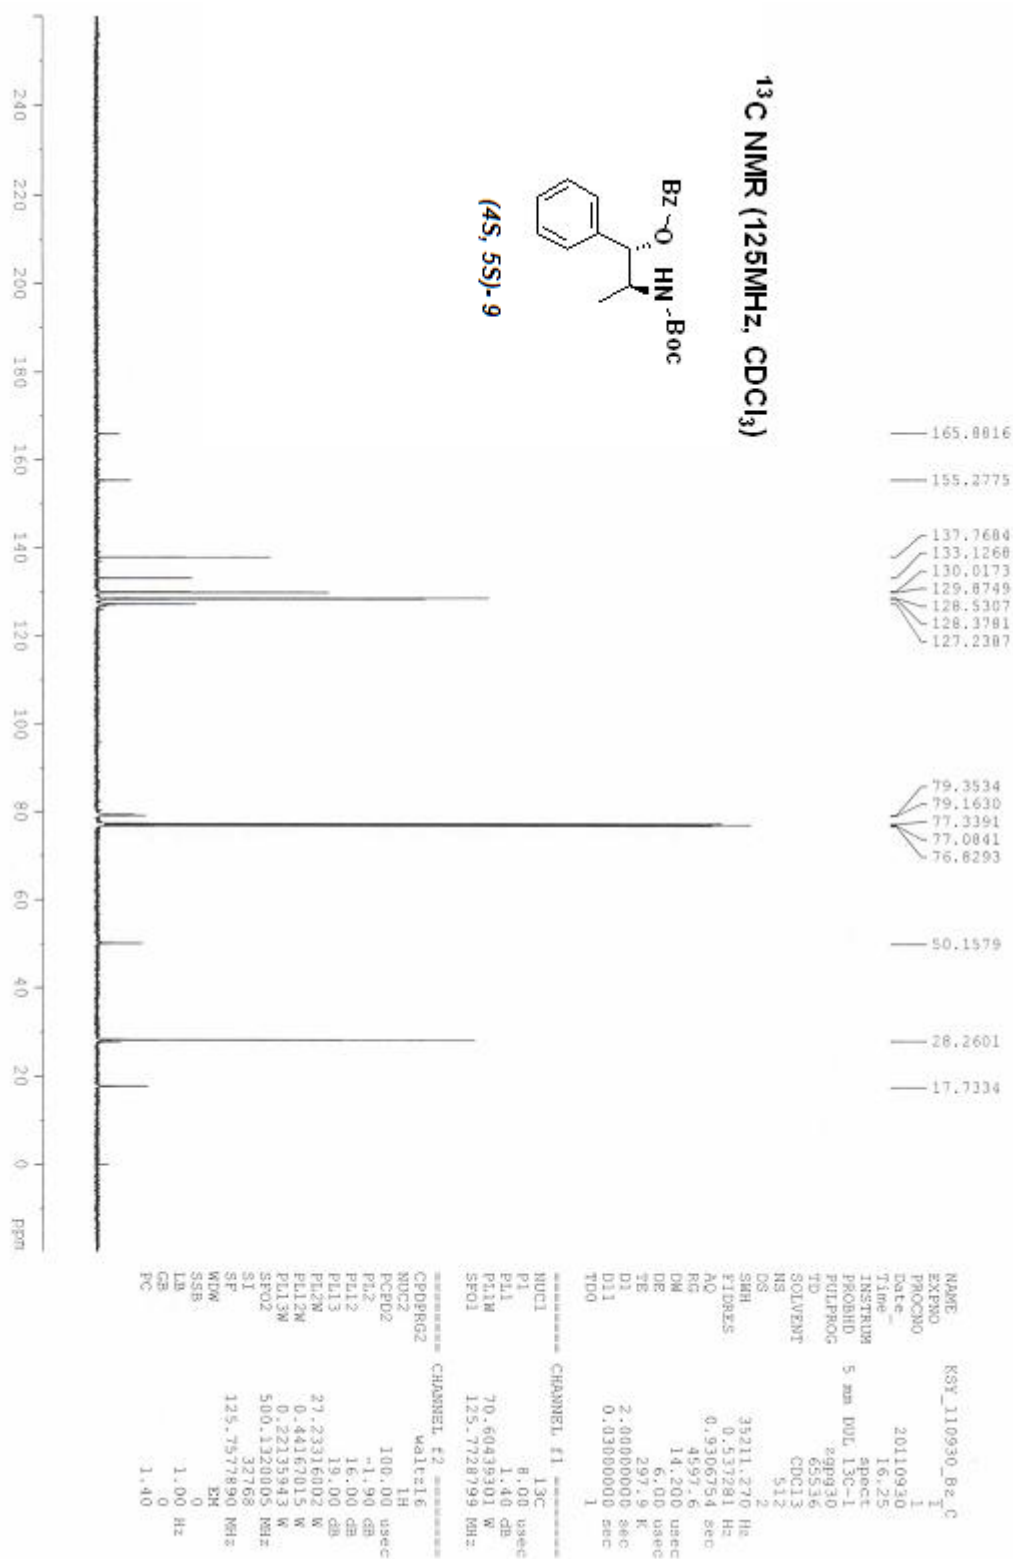



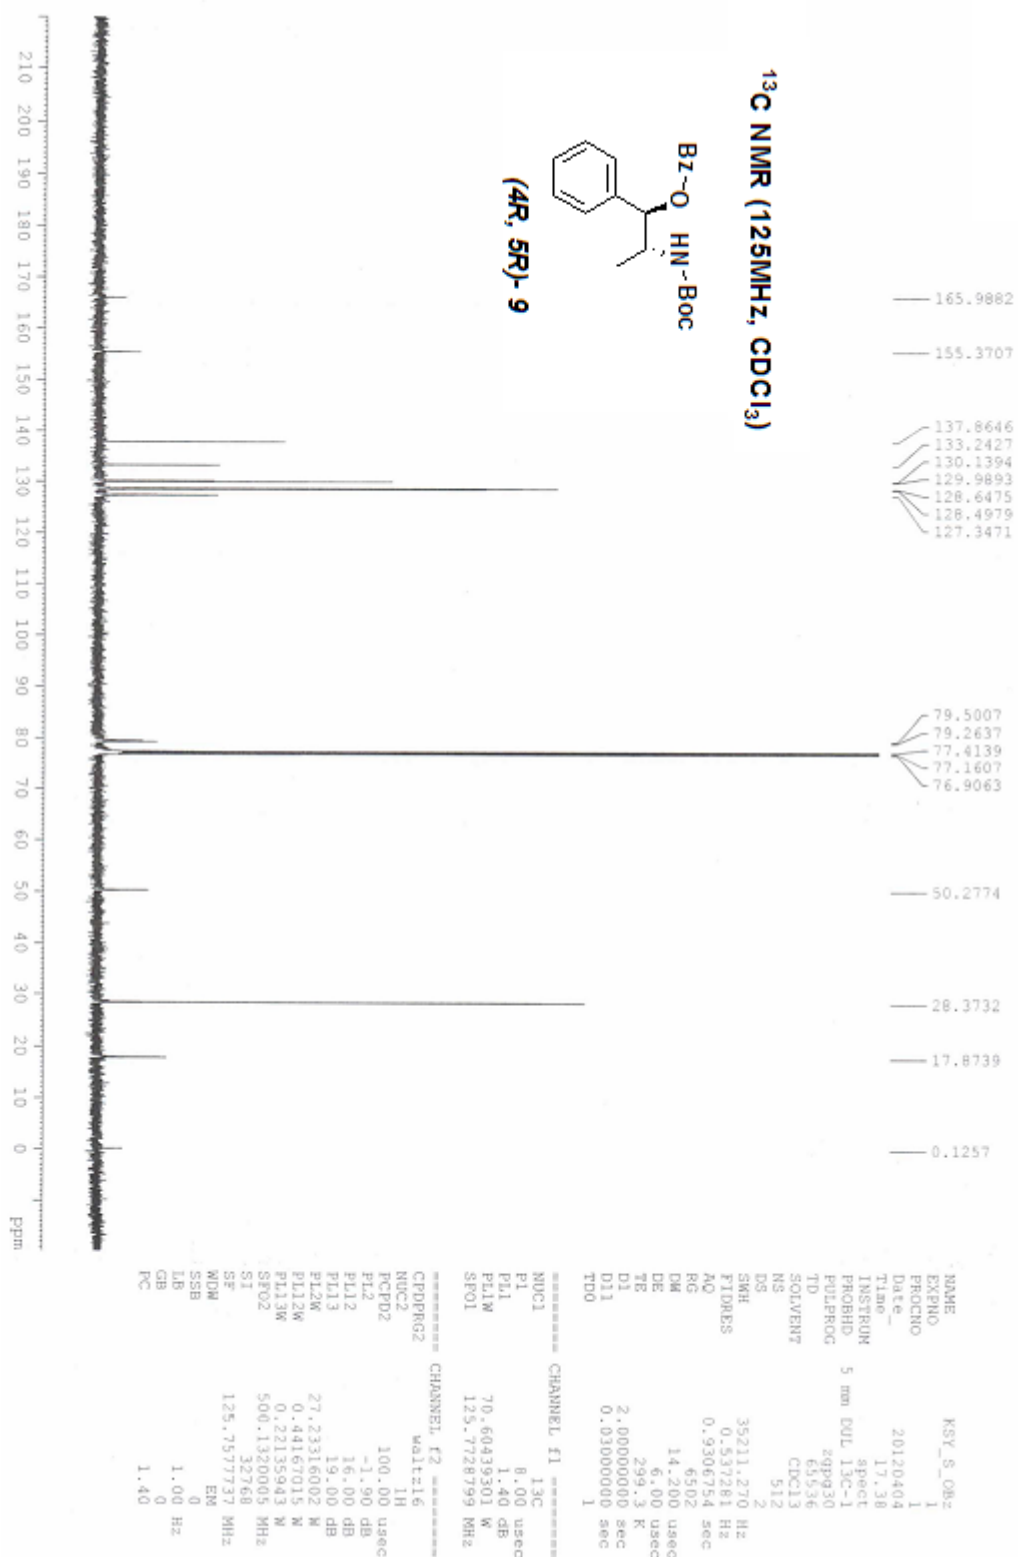

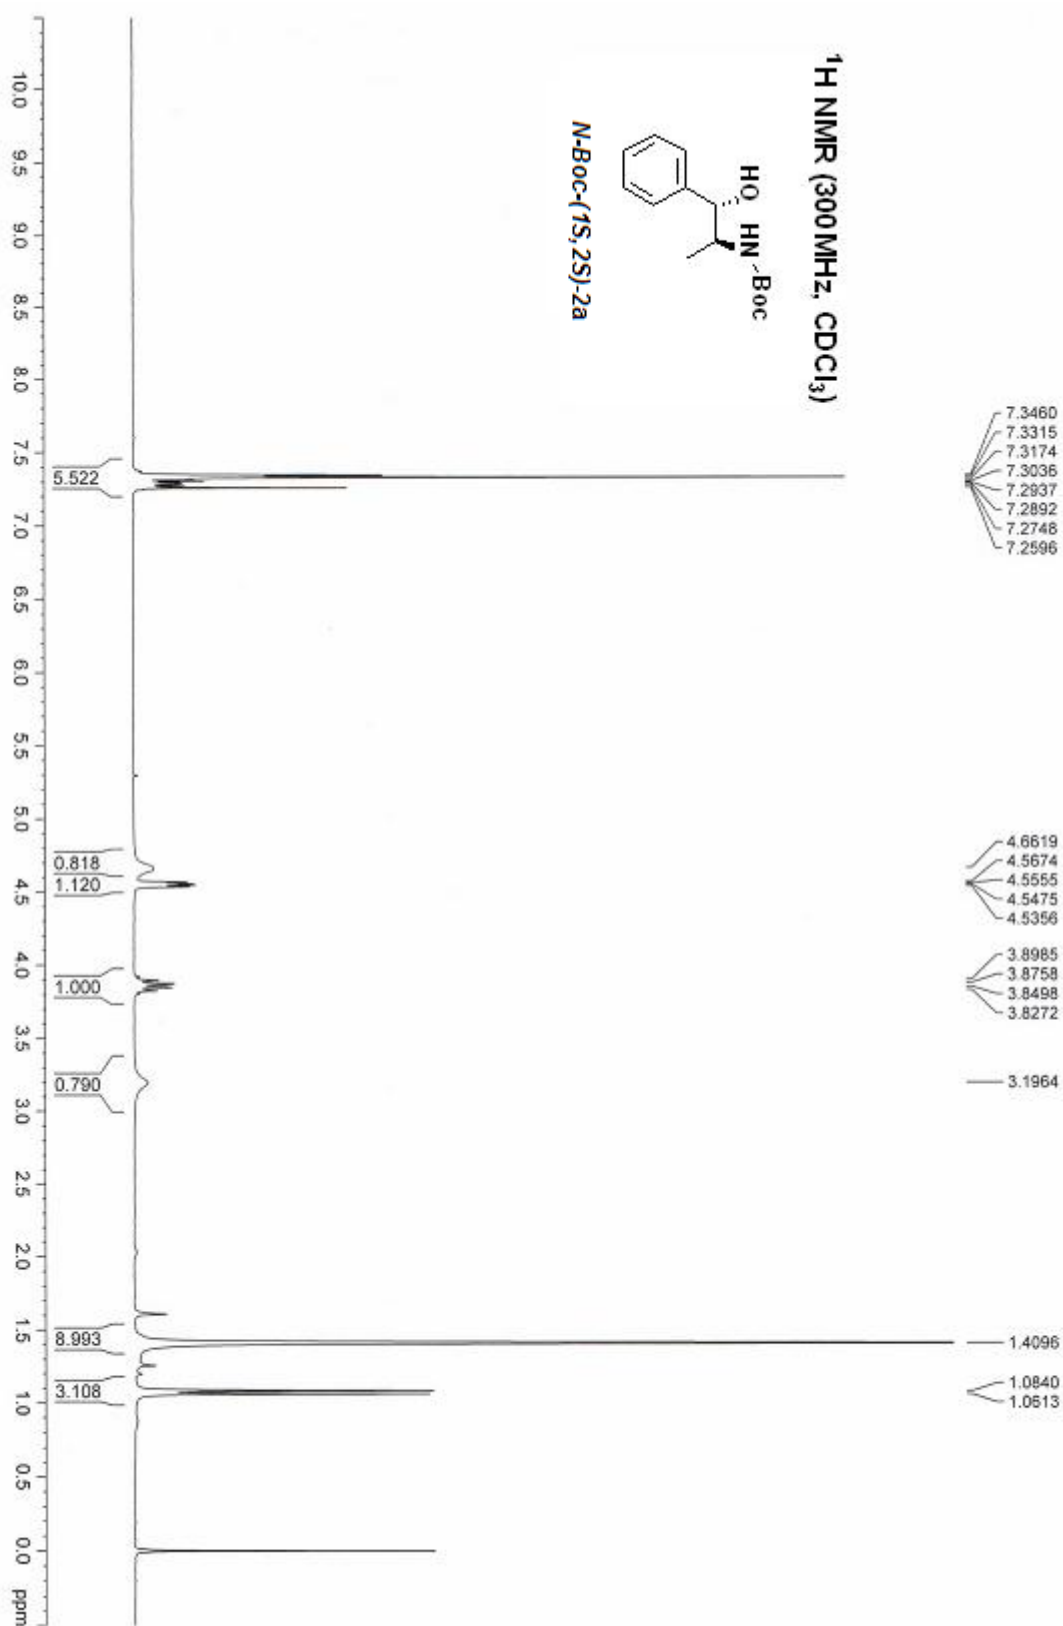

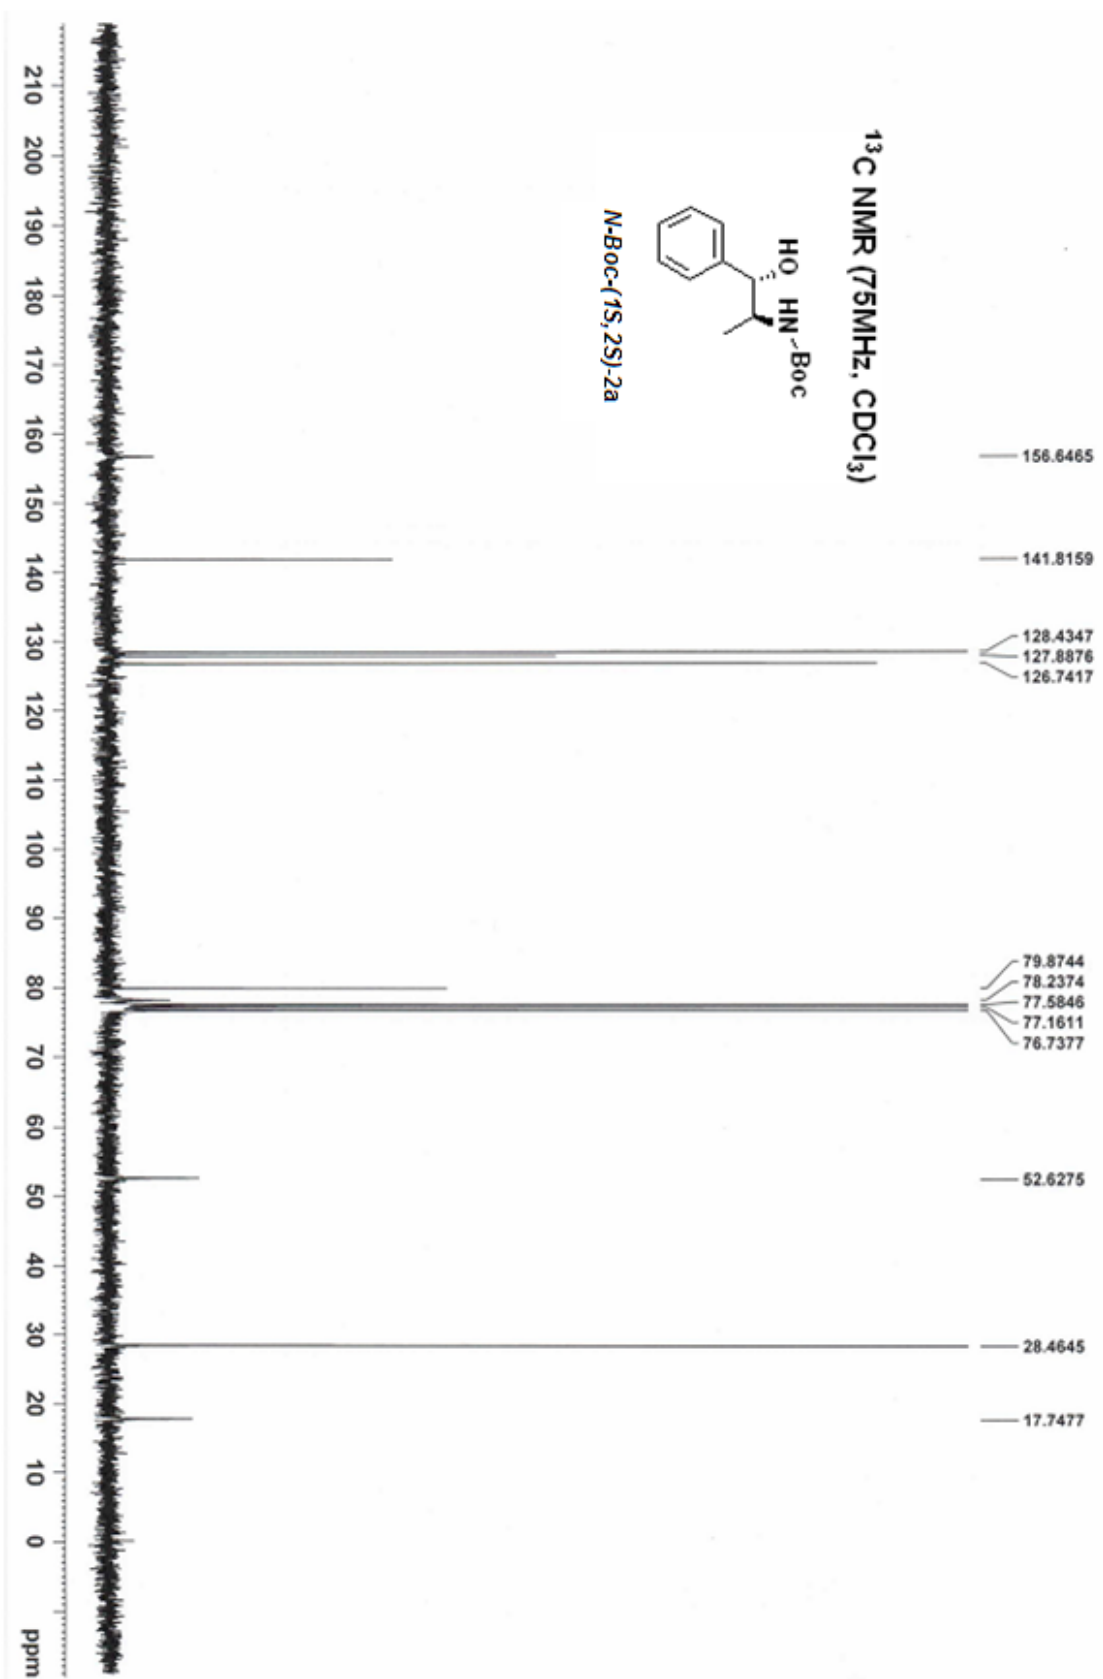

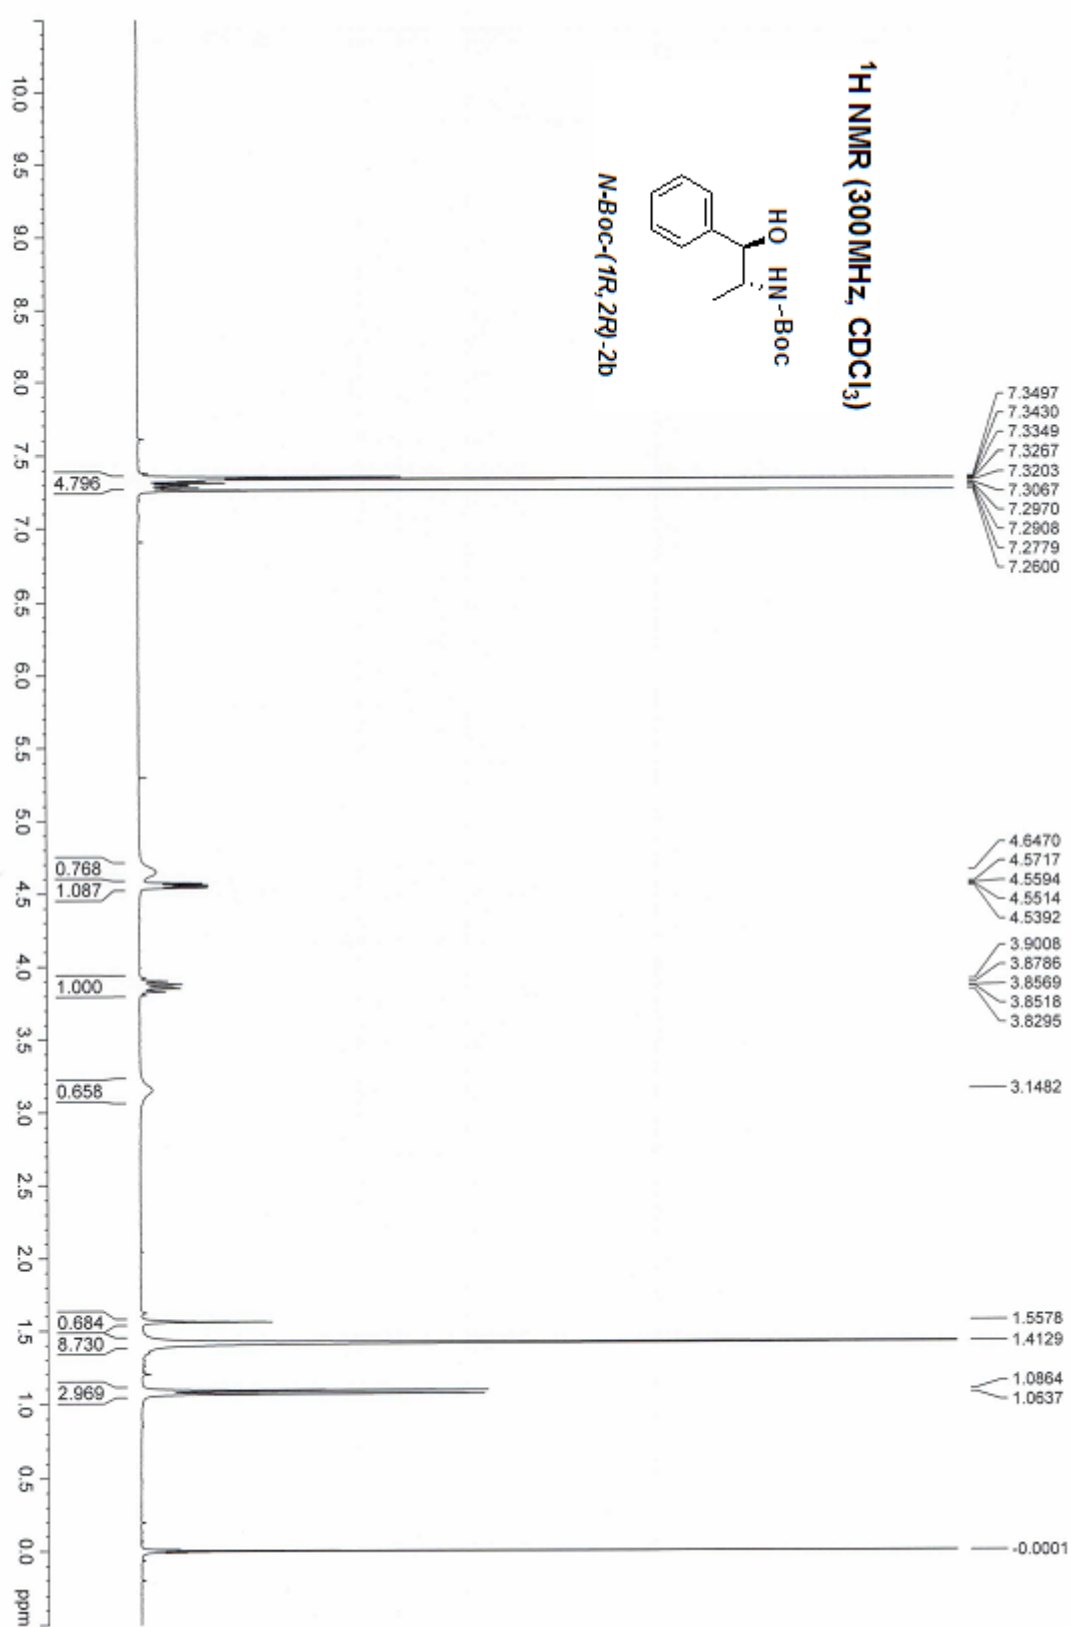

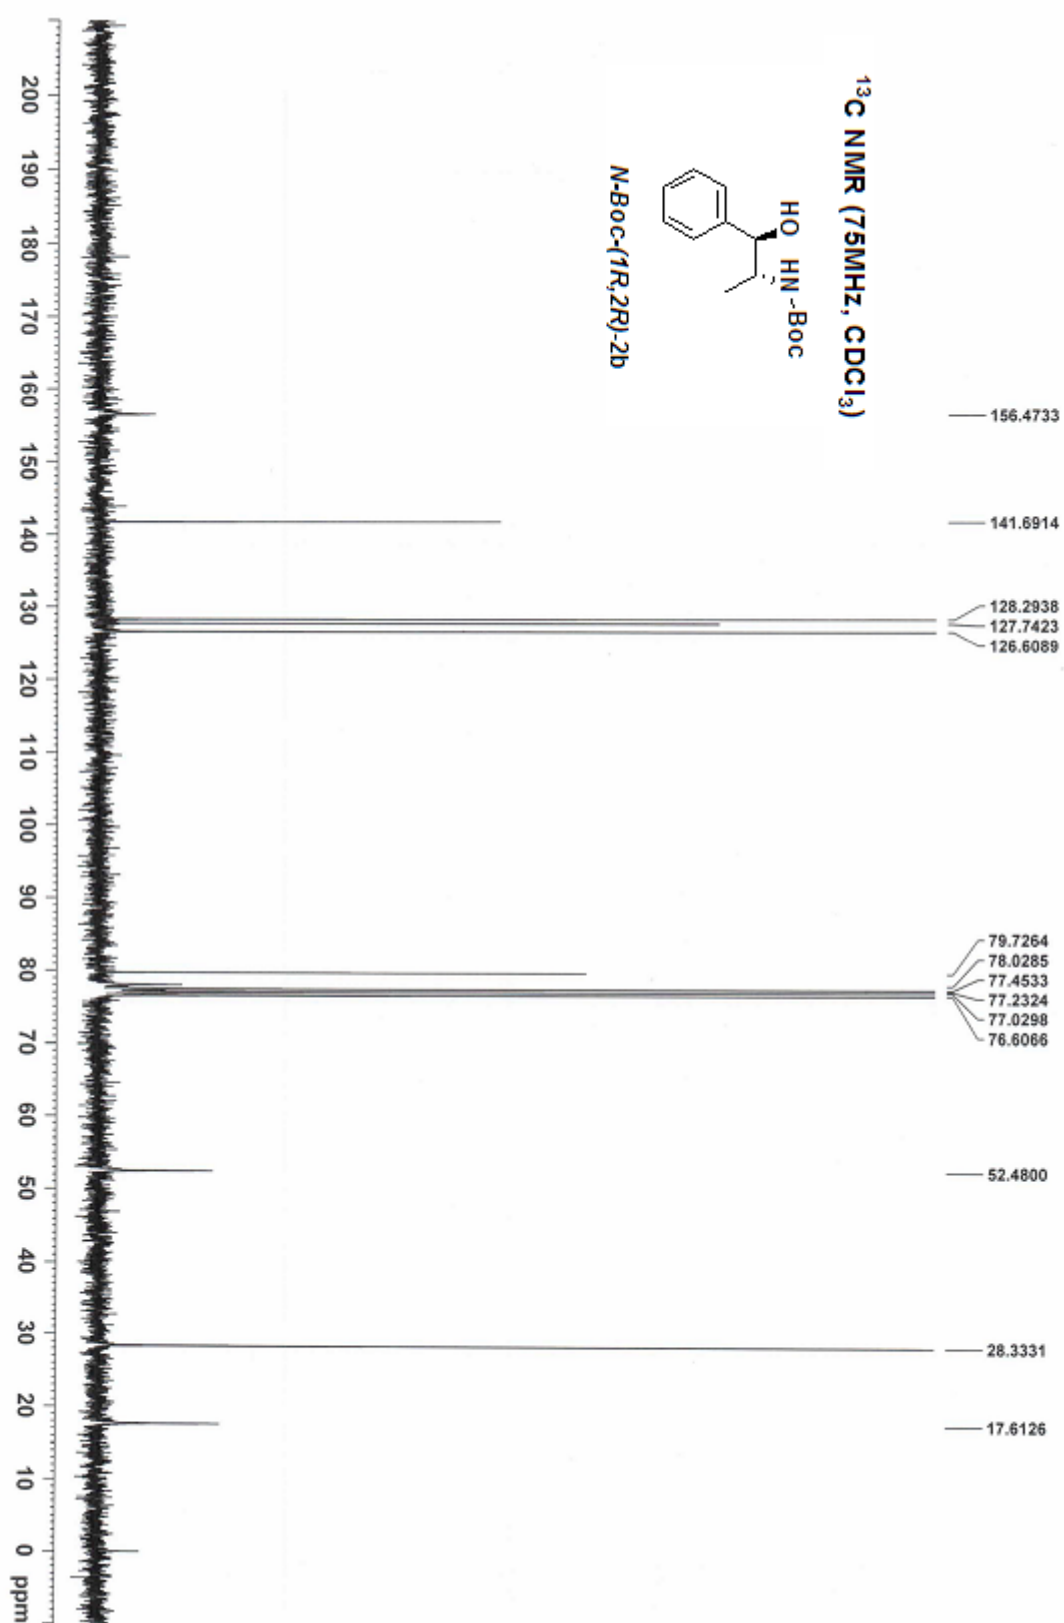



<sup>1</sup>H NMR (300MHz, CDCl<sub>3</sub>)

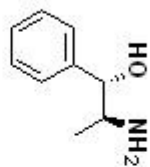

(1*S*, 2*S*)-(+)-Norpseudoephedrine 2a

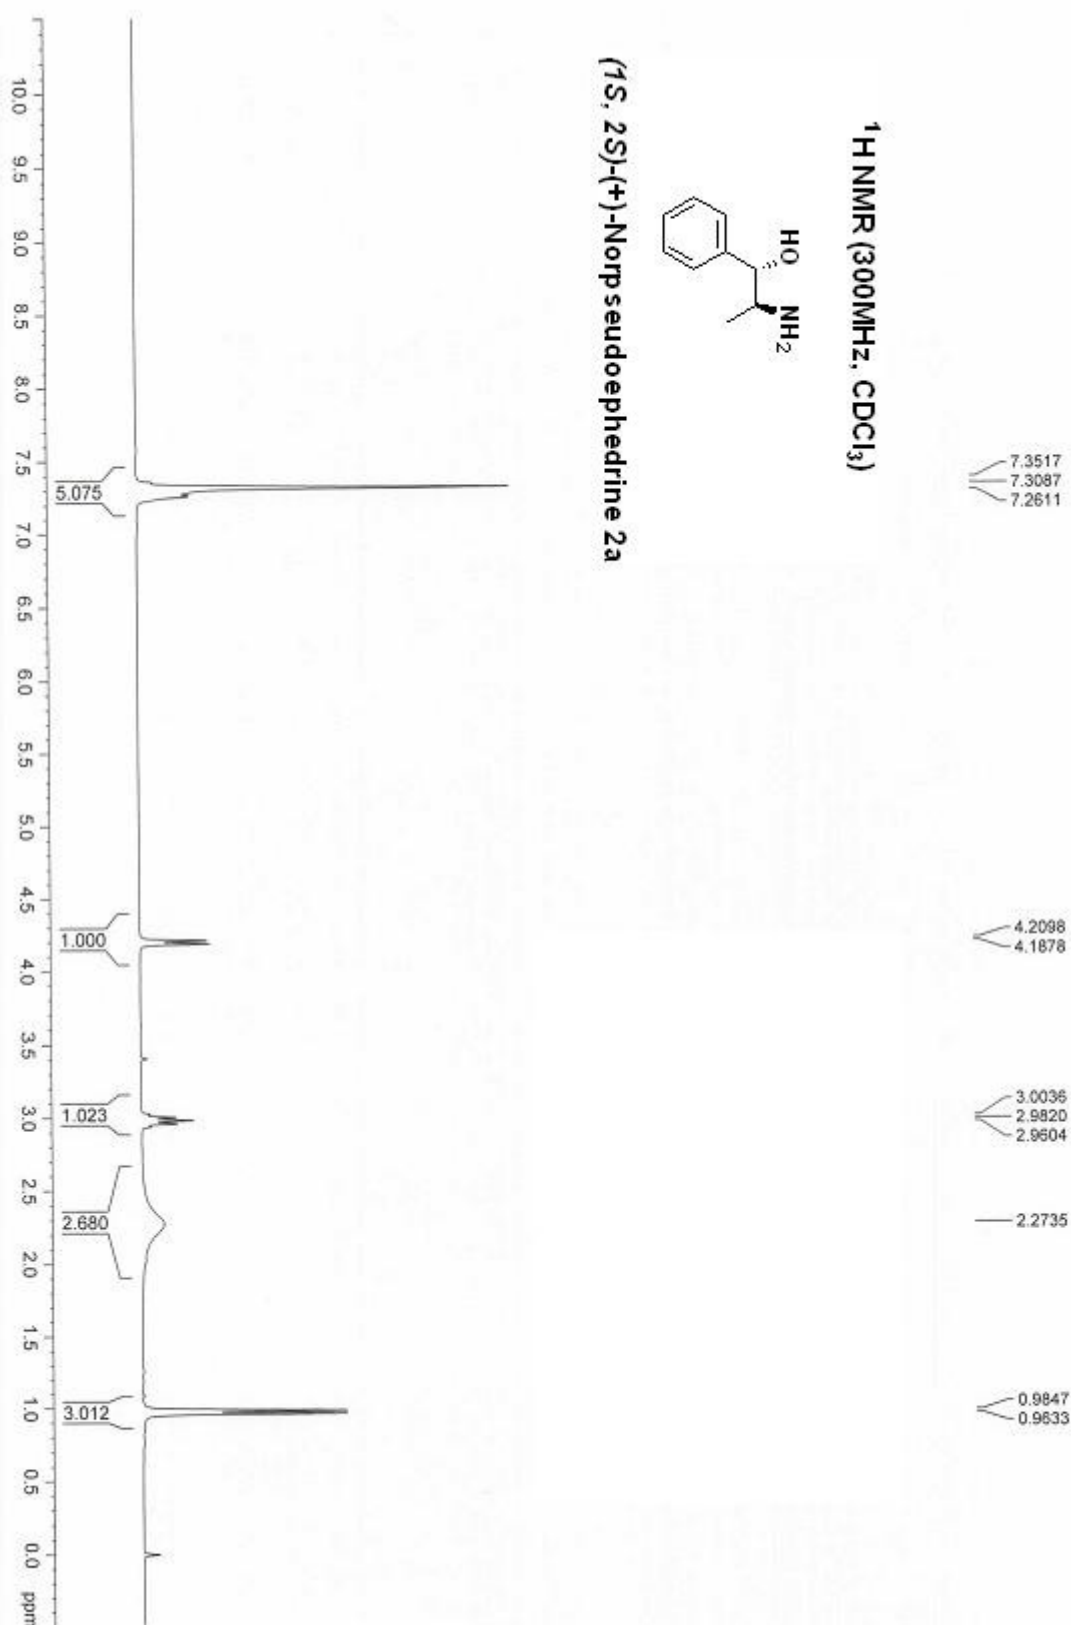

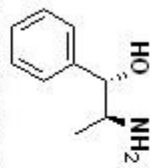

(1*S*, 2*S*)-(+)-Norpseudoephedrine 2a

<sup>13</sup>C NMR (125MHz, CDCl<sub>3</sub>)

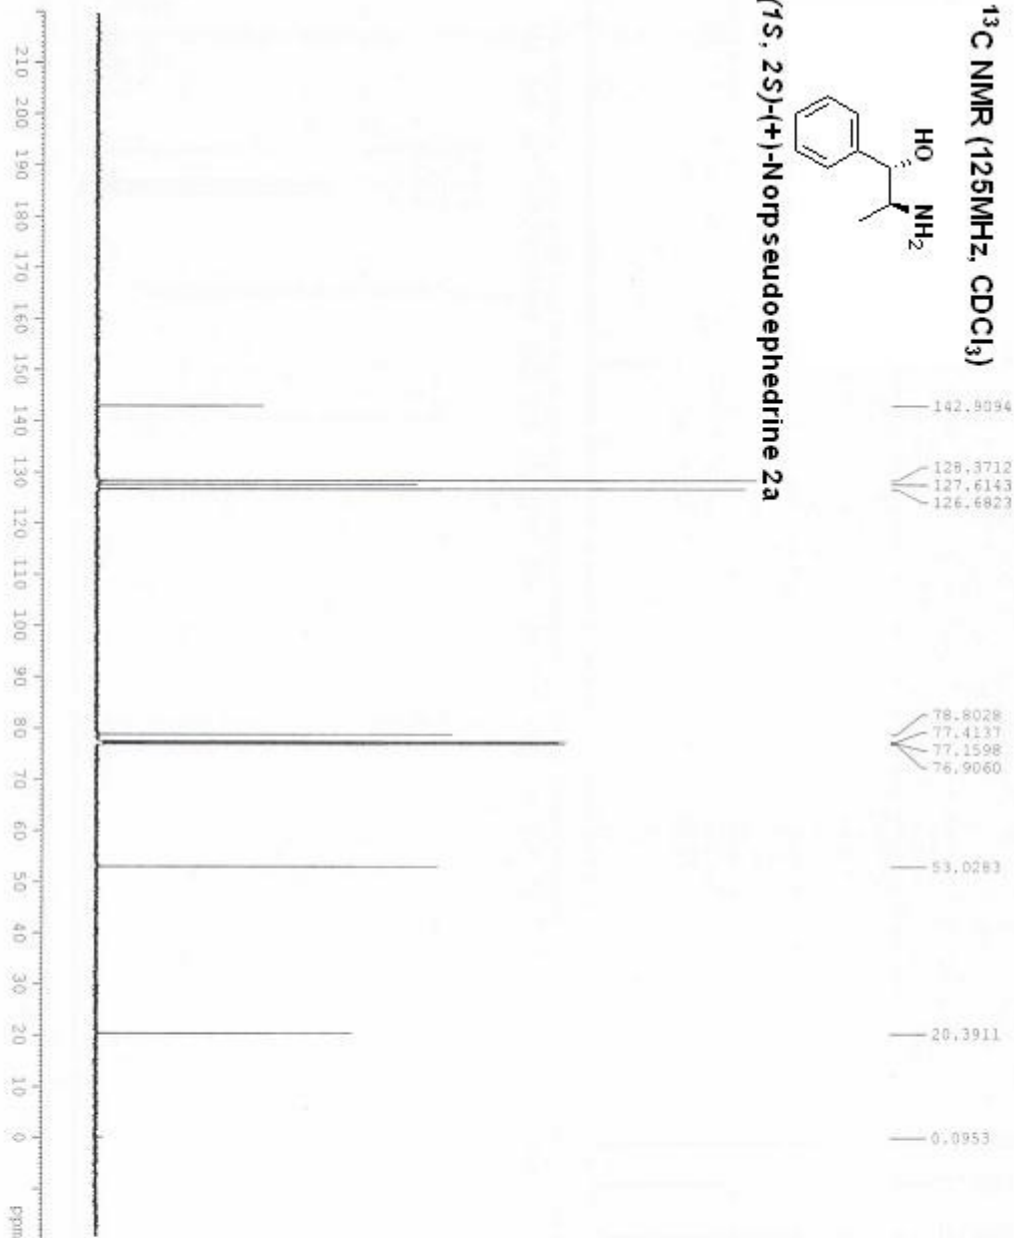

NAME RSV\_111216\_P2  
EXPNO 1  
PROCNO 1  
Date\_ 20111216  
Time 17.34  
INSTRUM spect  
PROBHD 5 mm QNP 13C-1  
PULPROG zgpg30  
TD 65536  
F2 512  
SOLVENT CDCl3  
NS 4  
DS 4  
SWH 30036.029 Hz  
FIDRES 0.458272 Hz  
AQ 1.0912410 sec  
RG 7298.2  
PC 16.650 usec  
EW 6.50 usec  
TE 296.6 K  
D1 2.00000000 sec  
D11 0.03000000 sec  
TD0 1

CHANNEL F1 13C  
NUC1 13C  
P1 0.00 usec  
PL1 1.40 dB  
PL1W 70.60439101 W  
SFO1 125.7703643 MHz

CHANNEL F2 1H  
CHPFGZ 601tc16  
NUC2 1H  
PCPD2 100.00 usec  
P12 -1.90 dB  
PL12 16.00 dB  
PL13 19.00 dB  
PL2W 27.23316002 W  
PL12W 0.44167015 W  
PL13W 0.22135943 W  
SFO2 500.1320005 MHz  
SI 32768  
SF 125.7577795 MHz  
WDW EN  
SSB 0  
LB 1.00 Hz  
GB 0  
PC 1.40

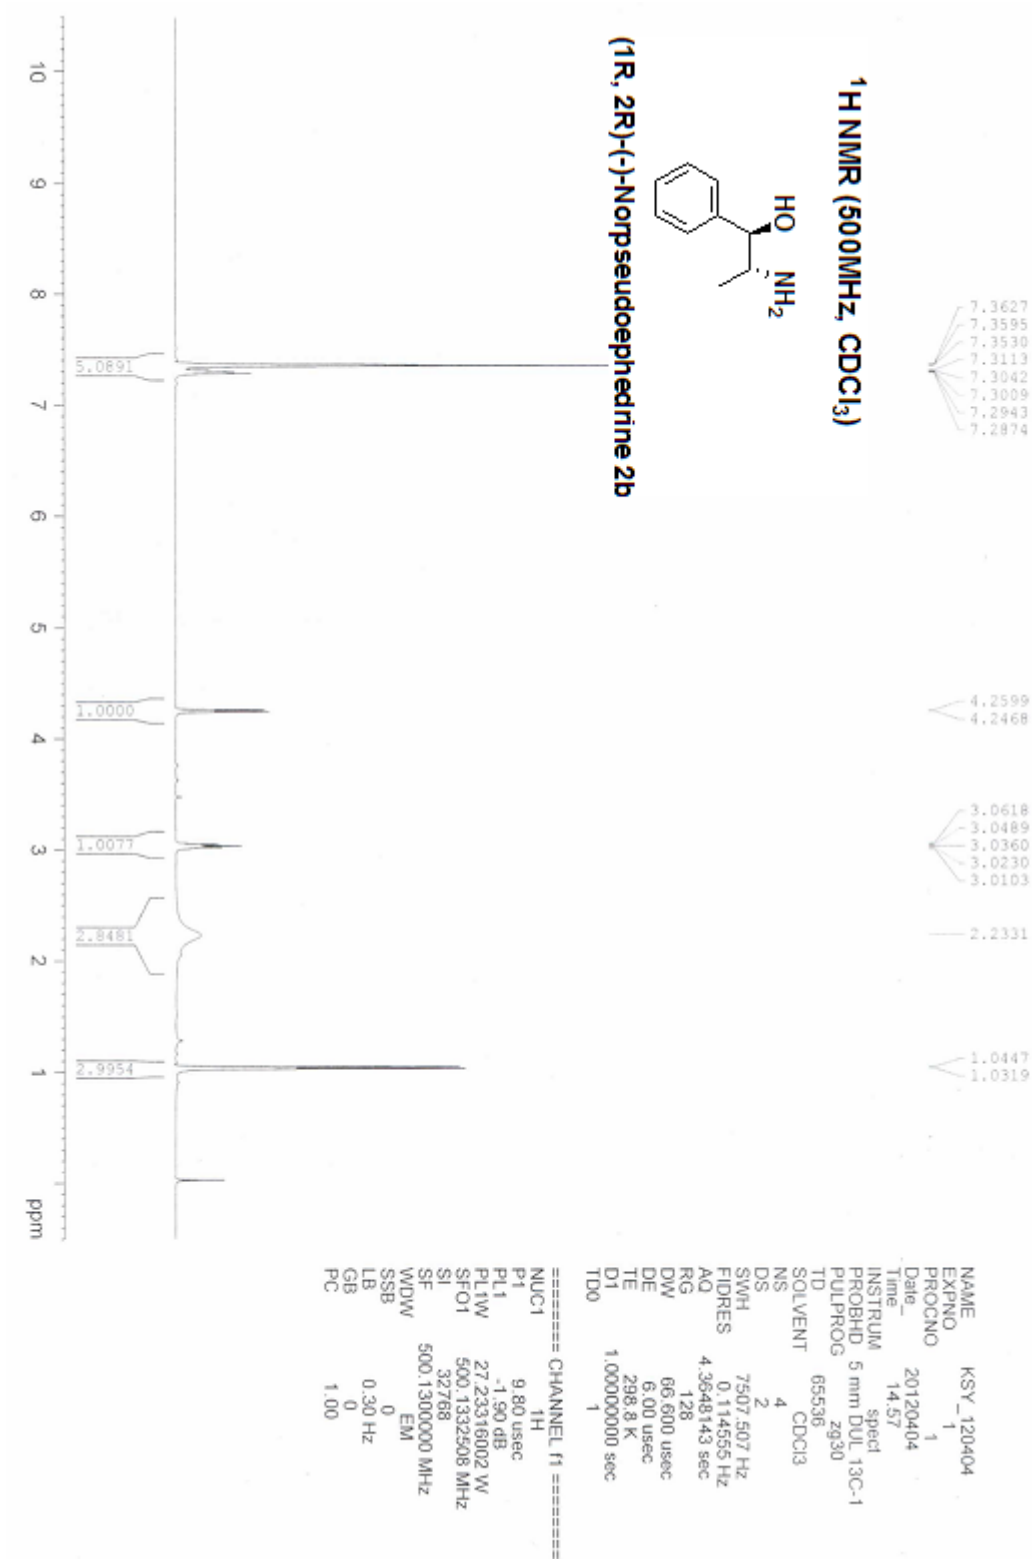

<sup>13</sup>C NMR (125MHz, CDCl<sub>3</sub>)

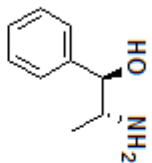

(1R, 2R)-(-)-Norpseudoephedrine 2b

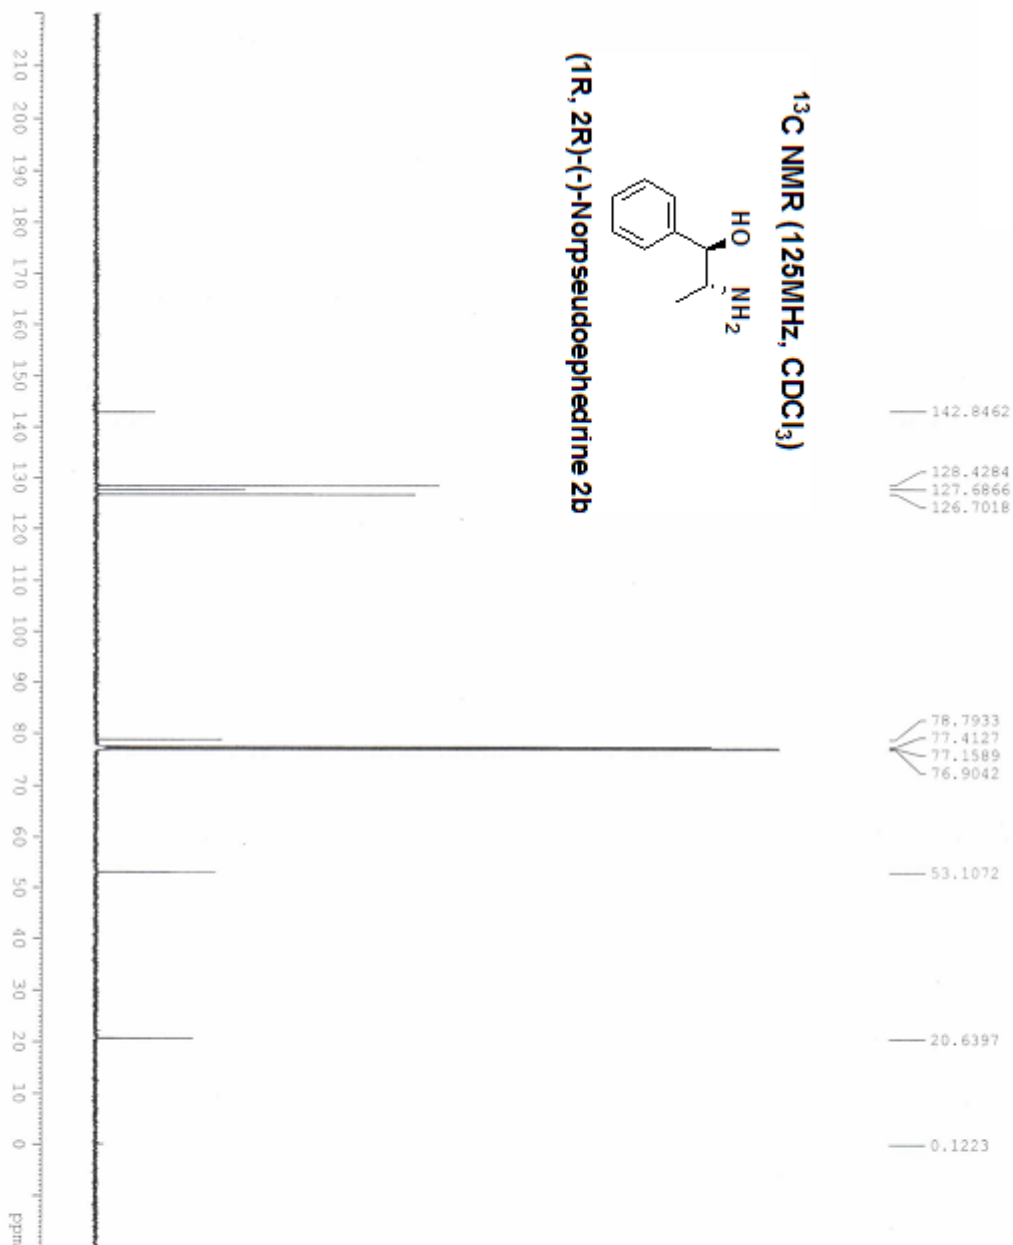

NAME XSY\_S PE  
EXPRO 1  
PROCNO 1  
Date 20120404  
Time 18.10  
INSTRUM spect  
PROBHD 5 mm DUL 13C-1  
PULPROG zgpg30  
TD 65536  
SOLVENT CDCl3  
NS 512  
DS 2  
SWH 35211.270 Hz  
FIDRES 0.537281 Hz  
AQ 0.9306754 sec  
RG 1525.5  
DW 14.200 usec  
DE 6.00 usec  
TE 299.2 K  
D1 2.00000000 sec  
D11 0.03000000 sec  
TD0 1

CHANNEL f1  
NUC1 13C  
P1 8.00 usec  
PL1 1.40 dB  
PL1W 70.60439301 W  
SFO1 125.7728799 MHz

CHANNEL f2  
CPDPRG2 waltz16  
NUC2 1H  
PCPD2 100.00 usec  
PL2 -1.90 dB  
PL12 16.00 dB  
PL13 19.00 dB  
PL2W 27.23316002 W  
PL12W 0.44167015 W  
SFO2 500.1320005 MHz  
SI 32768  
SF 125.7577741 MHz  
RDM EM  
SSB 0  
LB 1.00 Hz  
GB 0  
PC 1.40
